# Supplementary material for: Patient-reported outcomes for the phase 3 FURLONG study of furmonertinib versus gefitinib as first-line therapy for Chinese patients with locally advanced or metastatic EGFR mutation-positive non-small cell lung cancer
Source: PubMed Central journal article supplement — Lancet Reg Health West Pac. 2024 Jun 17;48:101122. doi: 10.1016/j.lanwpc.2024.101122 (PMC11238182; doi:10.1016/j.lanwpc.2024.101122), 2024-06-17
Supplement: mmc1.pdf [file mmc1.pdf]

## Content

|                                                                                                                                                                                                      |    |
|------------------------------------------------------------------------------------------------------------------------------------------------------------------------------------------------------|----|
| Site and investigator list of FURLONG study .....                                                                                                                                                    | 1  |
| Supplementary Table 1: Baseline demographic and clinical characteristics of patients in the full analysis set, all of whom were included in the patient-reported outcome analysis .....              | 4  |
| Supplementary Table 2: Compliance with the patient-reported outcomes assessments .....                                                                                                               | 5  |
| Supplementary Table 3: Adjusted least square mean changes from baseline to randomized treatment discontinuation .....                                                                                | 6  |
| Supplementary Table 4: Adjusted least square mean changes between last PRO assessment and baseline in patients who discontinued treatment (assessment was taken at day 7 after the final dose) ..... | 8  |
| Supplementary Figure 1: Changes in other functioning, symptom and financial difficulty from baseline to week 90 .....                                                                                | 10 |
| Supplementary Figure 2: Kaplan-Meier curves of time to deterioration .....                                                                                                                           | 22 |

### Site and investigator list of FURLONG study

| Site                                                                                                                                                            | Investigator(s)    | Enrolment                   |
|-----------------------------------------------------------------------------------------------------------------------------------------------------------------|--------------------|-----------------------------|
| National Cancer Center and National Clinical Research Center for Cancer and Cancer Hospital, Chinese Academy of Medical Sciences & Peking Union Medical College | Yuankai Shi        | 0                           |
| Harbin Medical University Cancer Hospital                                                                                                                       | Gongyan Chen       | 20                          |
| Hunan Cancer Hospital                                                                                                                                           | Lin Wu / Nong Yang | 20 (Lin Wu 12, Nong Yang 8) |
| Xuzhou Central Hospital                                                                                                                                         | Xiang Wang         | 13                          |
| The First Hospital of China Medical University                                                                                                                  | Yunpeng Liu        | 13                          |
| The People's Hospital of Guangxi Zhuang Autonomous Region                                                                                                       | Yanrong Hao        | 12                          |
| Cancer Hospital of Xinjiang Medical University                                                                                                                  | Chunling Liu       | 11                          |
| The Affiliated Hospital of Xuzhou Medical College                                                                                                               | Shuyang Zhu        | 11                          |
| Nantong Cancer Hospital                                                                                                                                         | Xiaodong Zhang     | 11                          |
| The First Affiliated Hospital of Wenzhou Medical University                                                                                                     | Yuping Li          | 11                          |
| The First Affiliated Hospital of Dalian Medical University                                                                                                      | Jiwei Liu          | 10                          |
| The First Affiliated Hospital of USTC                                                                                                                           | Lejie Cao          | 10                          |
| Jilin Cancer Hospital                                                                                                                                           | Ying Cheng         | 10                          |
| The Second Hospital of Anhui University                                                                                                                         | Hui Zhao           | 9                           |
| Beijing Chest Hospital                                                                                                                                          | Shucaizhang        | 9                           |
| Affiliated Hospital of Hebei University                                                                                                                         | Aimin Zang         | 8                           |

|                                                                          |                                 |   |
|--------------------------------------------------------------------------|---------------------------------|---|
| The First Hospital of Jilin University                                   | Jiuwei Cui                      | 8 |
| Affiliated Hospital of Nantong University                                | Jian Feng                       | 8 |
| Tianjin Medical University Cancer Institute & Hospital                   | Changli Wang /<br>Richeng Jiang | 7 |
| The First Affiliated Hospital of Xinxiang Medical University             | Hongrui Niu                     | 7 |
| Shanxi Province People's Hospital                                        | Mei He                          | 7 |
| The Second People's Hospital of Neijiang                                 | Ou Jiang                        | 7 |
| General Hospital of Ningxia Medical University                           | Xiuzhong Li                     | 7 |
| Henan Cancer Hospital                                                    | Zhiyong Ma                      | 7 |
| Affiliated Cancer Hospital and Institute of Guangzhou Medical University | Chuan Jin                       | 6 |
| The First Affiliated Hospital of Xiamen University                       | Feng Ye                         | 6 |
| Guangxi Medical University Affiliated Tumor Hospital                     | Qitao Yu                        | 6 |
| Liaoning Cancer Hospital & Institute                                     | Xiaoling Li                     | 6 |
| Taihe Hospital                                                           | Zhiguo Luo                      | 6 |
| The First Affiliated Hospital of Guangzhou Medical University            | Chengzhi Zhou                   | 5 |
| Army Medical Center of PLA                                               | Dong Wang                       | 5 |
| Weifang People's Hospital                                                | Guohua Yu                       | 5 |
| Zhongshan Hospital                                                       | Qunying Hong                    | 5 |
| Henan Province People's Hospital                                         | Shudong Cang                    | 5 |
| Nanjing First Hospital                                                   | Wei Gu                          | 5 |
| The Affiliated Hospital of Inner Mongolia Medical University             | Xiuhua Fu                       | 5 |
| Lishui City People's Hospital                                            | Zhuo Cao                        | 5 |

|                                                                                       |               |   |
|---------------------------------------------------------------------------------------|---------------|---|
| The Second Affiliated Hospital of Nanchang University                                 | Anwen Liu     | 4 |
| Liuzhou People's Hospital                                                             | Jingzhang Li  | 4 |
| The First Affiliated Hospital, Zhejiang University                                    | Jiaying Zhou  | 4 |
| Shanghai Chest Hospital                                                               | Liyan Jiang   | 4 |
| Union Hospital, Tongji Medical College, Huazhong University of Science and Technology | Li Liu        | 4 |
| The First People's Hospital of Changzhou                                              | Mei Ji        | 4 |
| The First Affiliated Hospital of Zhengzhou University                                 | Qingxia Fan   | 4 |
| PLA Cancer Centre of Nanjing Bayi Hospital                                            | Shukai Qin    | 4 |
| Zhejiang Cancer Hospital                                                              | Yiping Zhang  | 4 |
| Beijing Cancer Hospital                                                               | Ziping Wang   | 4 |
| Beijing Cancer Hospital                                                               | Jian Fang     | 3 |
| Affiliated Hospital of Guilin Medical University                                      | Libing Ma     | 3 |
| The Second Affiliated Hospital Zhejiang University School of Medicine                 | Jianjin Huang | 2 |
| Sir Run Run Shaw Hospital Zhejiang University School of Medicine                      | Kejing Ying   | 2 |
| People's Hospital of Xinjiang Uygur Autonomous Region                                 | Jiang Liu     | 1 |
| Peking Union Medical College Hospital                                                 | Mengzhao Wang | 1 |
| Shanghai Changzheng Hospital                                                          | Bing Li       | 0 |
| The Second Hospital of Dalian Medical University                                      | Yang Zhang    | 0 |

**Supplementary Table 1: Baseline demographic and clinical characteristics of patients in the full analysis set, all of whom were included in the patient-reported outcome analysis**

| Characteristics        |                          | Furmonertinib<br>(N=178) | Gefitinib<br>(N=179) |
|------------------------|--------------------------|--------------------------|----------------------|
| <b>Age</b>             | Median, years (range)    | 59 (31-81)               | 60 (32-83)           |
| <b>Sex</b>             | Female, n (%)            | 116 (65)                 | 111 (62)             |
|                        | Male, n (%)              | 62 (35)                  | 68 (38)              |
| <b>ECOG PS</b>         | 0, n (%)                 | 39 (22)                  | 28 (16)              |
|                        | 1, n (%)                 | 138 (78)                 | 151 (84)             |
|                        | 2, n (%)                 | 1 (1)                    | 0                    |
| <b>EGFR mutation</b>   | Exon 19 deletions, n (%) | 91 (51)                  | 92 (51)              |
|                        | Exon 21 Leu858Arg, n (%) | 87 (49)                  | 87 (49)              |
| <b>Smoking history</b> | Yes, n (%)               | 41 (23)                  | 44 (25)              |
|                        | No, n (%)                | 137 (77)                 | 135 (75)             |
| <b>Disease stage</b>   | III, n (%)               | 10 (6)                   | 7 (4)                |
|                        | IV, n (%)                | 168 (94)                 | 172 (96)             |
| <b>CNS metastases</b>  | Yes, n (%)               | 63 (35)                  | 58 (32)              |
|                        | No, n (%)                | 115 (65)                 | 121 (68)             |

All patients were Chinese.

ECOG=Eastern Cooperative Oncology Group. PS=performance status. EGFR=epidermal growth factor receptor. CNS=central nervous system.

**Supplementary Table 2: Compliance with the patient-reported outcomes assessments**

| Assessment time point | Furmonertinib (N=178) |             |               |                |               | Gefitinib (N=179) |             |               |                |               |
|-----------------------|-----------------------|-------------|---------------|----------------|---------------|-------------------|-------------|---------------|----------------|---------------|
|                       | EORTC QLQ-C30         |             |               | EORTC QLQ-LC13 |               | EORTC QLQ-C30     |             |               | EORTC QLQ-LC13 |               |
|                       | Expected, n           | Received, n | Compliance, % | Received, n    | Compliance, % | Expected, n       | Received, n | Compliance, % | Received, n    | Compliance, % |
| <b>Baseline</b>       | 178                   | 178         | 100           | 178            | 100           | 179               | 179         | 100           | 179            | 100           |
| <b>C2D1</b>           | 176                   | 176         | 100           | 176            | 100           | 177               | 177         | 100           | 177            | 100           |
| <b>C3D1</b>           | 175                   | 175         | 100           | 175            | 100           | 175               | 175         | 100           | 175            | 100           |
| <b>C4D1</b>           | 168                   | 166         | 98.8          | 166            | 98.8          | 166               | 165         | 99.4          | 165            | 99.4          |
| <b>C5D1</b>           | 165                   | 161         | 97.6          | 161            | 97.6          | 159               | 158         | 99.4          | 158            | 99.4          |
| <b>C6D1</b>           | 161                   | 153         | 95.0          | 153            | 95.0          | 151               | 147         | 97.4          | 147            | 97.4          |
| <b>C7D1</b>           | 157                   | 150         | 95.5          | 150            | 95.5          | 149               | 147         | 98.7          | 146            | 98.0          |
| <b>C9D1</b>           | 154                   | 151         | 98.1          | 151            | 98.1          | 139               | 136         | 97.8          | 136            | 97.8          |
| <b>C11D1</b>          | 146                   | 143         | 97.9          | 143            | 97.9          | 128               | 124         | 96.9          | 123            | 96.1          |
| <b>C13D1</b>          | 138                   | 138         | 100           | 138            | 100           | 114               | 110         | 96.5          | 110            | 96.5          |
| <b>C15D1</b>          | 132                   | 132         | 100           | 132            | 100           | 101               | 101         | 100           | 101            | 100           |
| <b>C17D1</b>          | 128                   | 127         | 99.2          | 127            | 99.2          | 91                | 90          | 98.9          | 90             | 98.9          |
| <b>C19D1</b>          | 117                   | 117         | 100           | 117            | 100           | 80                | 80          | 100           | 79             | 98.8          |
| <b>C23D1</b>          | 110                   | 110         | 100           | 110            | 100           | 66                | 66          | 100           | 66             | 100           |
| <b>C27D1</b>          | 95                    | 94          | 98.9          | 94             | 98.9          | 50                | 49          | 98.0          | 49             | 98.0          |
| <b>C31D1</b>          | 83                    | 83          | 100           | 83             | 100           | 34                | 34          | 100           | 34             | 100           |
| <b>C35D1</b>          | 38                    | 38          | 100           | 38             | 100           | 15                | 15          | 100           | 15             | 100           |
| <b>Follow-up</b>      | 102                   | 86          | 84.3          | 86             | 84.3          | 155               | 130         | 83.9          | 130            | 83.9          |

EORTC=European Organization for Research and Treatment of Cancer. QLQ-C30=Quality-of-Life Questionnaire Core 30. QLQ-LC13=Quality-of-Life Questionnaire Lung cancer 13. C=cycle. D=day.

**Supplementary Table 3: Adjusted least square mean changes from baseline to randomized treatment discontinuation**

|                        | Least square mean changes from baseline |                                       | Adjusted between group difference*<br>(95% CI) | p-value          |
|------------------------|-----------------------------------------|---------------------------------------|------------------------------------------------|------------------|
|                        | (95% CI)                                |                                       |                                                |                  |
|                        | Furmonertinib<br>(N=178)                | Gefitinib<br>(N=179)                  |                                                |                  |
| <b>EORTC QLQ-C30</b>   |                                         |                                       |                                                |                  |
| HRQoL                  | 3.80<br>(1.76, 5.85)                    | 2.60<br>(0.51, 4.69)                  | 1.21<br>(-1.71, 4.13)                          | 0.417            |
| Physical functioning   | <b>3.90</b><br><b>(2.58, 5.22)</b>      | <b>1.76</b><br><b>(0.40, 3.11)</b>    | <b>2.14</b><br><b>(0.25, 4.04)</b>             | <b>0.027</b>     |
| Role functioning       | 1.86<br>(0.25, 3.47)                    | 0.58<br>(-1.07, 2.22)                 | 1.29<br>(-1.01, 3.59)                          | 0.272            |
| Emotional functioning  | 3.17<br>(1.89, 4.45)                    | 3.05<br>(1.74, 4.35)                  | 0.12<br>(-1.70, 1.95)                          | 0.893            |
| Cognitive functioning  | 0.20<br>(-1.14, 1.55)                   | -0.96<br>(-2.35, 0.43)                | 1.16<br>(-0.77, 3.10)                          | 0.238            |
| Social functioning     | 1.69<br>(-0.38, 3.77)                   | 0.16<br>(-1.96, 2.29)                 | 1.53<br>(-1.44, 4.50)                          | 0.311            |
| Fatigue                | -7.22<br>(-8.87, -5.56)                 | -6.00<br>(-7.71, -4.30)               | -1.21<br>(-3.59, 1.16)                         | 0.317            |
| Nausea/vomiting        | <b>-2.29</b><br><b>(-3.03, -1.55)</b>   | <b>-0.73</b><br><b>(-1.50, 0.03)</b>  | <b>-1.56</b><br><b>(-2.62, -0.49)</b>          | <b>0.004</b>     |
| Pain                   | -8.17<br>(-9.86, -6.66)                 | -6.12<br>(-7.70, -4.54)               | -2.05<br>(-4.24, 0.14)                         | 0.066            |
| Dyspnoea               | -6.47<br>(-8.21, -4.73)                 | -4.83<br>(-6.63, -3.03)               | -1.64<br>(-4.14, 0.87)                         | 0.199            |
| Insomnia               | -7.22<br>(-8.80, -5.64)                 | -6.72<br>(-8.36, -5.08)               | -0.50<br>(-2.78, 1.78)                         | 0.666            |
| Appetite loss          | <b>-4.26</b><br><b>(-5.56, -2.86)</b>   | <b>-2.02</b><br><b>(-3.47, -0.56)</b> | <b>-2.24</b><br><b>(-4.26, -0.23)</b>          | <b>0.029</b>     |
| Constipation           | -1.58<br>(-2.74, -0.42)                 | -1.98<br>(-3.19, -0.77)               | 0.40<br>(-1.28, 2.07)                          | 0.642            |
| Diarrhoea              | <b>1.93</b><br><b>(0.67, 3.19)</b>      | <b>5.29</b><br><b>(3.97, 6.61)</b>    | <b>-3.36</b><br><b>(-5.19, -1.54)</b>          | <b>&lt;0.001</b> |
| Financial difficulties | -7.27<br>(-10.04, -4.49)                | -5.19<br>(-8.03, -2.35)               | -2.08<br>(-6.05, 1.89)                         | 0.304            |
| <b>EORTC QLQ-L13</b>   |                                         |                                       |                                                |                  |
| Dyspnoea               | -6.65<br>(-8.27, -5.04)                 | -4.51<br>(-6.16, -2.85)               | -2.15<br>(-4.46, 0.16)                         | 0.068            |
| Cough                  | -15.08<br>(-17.21, -12.96)              | -16.28<br>(-18.47, -14.09)            | 1.20<br>(-1.85, 4.25)                          | 0.440            |
| Haemoptysis            | -1.72<br>(-2.36, -1.08)                 | -1.52<br>(-2.17, -0.87)               | -0.20<br>(-1.12, 0.71)                         | 0.663            |
| Sore mouth             | 1.62                                    | 2.56                                  | -0.94                                          | 0.336            |

|                                |                                        |                                       |                                       |              |
|--------------------------------|----------------------------------------|---------------------------------------|---------------------------------------|--------------|
|                                | (0.28, 2.95)                           | (1.17, 3.94)                          | (-2.86, 0.98)                         |              |
| <b>Dysphagia</b>               | -0.95<br>(-2.05, 0.14)                 | 0.00<br>(-1.14, 1.13)                 | -0.95<br>(-2.53, 0.63)                | 0.238        |
| <b>Peripheral neuropathy</b>   | -2.48<br>(-3.78, -1.18)                | -2.79<br>(-4.15, -1.43)               | 0.31<br>(-1.58, 2.19)                 | 0.750        |
| <b>Alopecia</b>                | <b>-0.51</b><br><b>(-1.83, 0.82)</b>   | <b>2.12</b><br><b>(0.73, 3.50)</b>    | <b>-2.62</b><br><b>(-4.54, -0.71)</b> | <b>0.007</b> |
| <b>Chest pain</b>              | -10.39<br>(-12.20, -8.57)              | -8.86<br>(-10.75, -6.98)              | -1.52<br>(-4.14, 1.10)                | 0.253        |
| <b>Pain in arm or shoulder</b> | -7.04<br>(-8.74, -5.34)                | -5.71<br>(-7.47, -3.94)               | -1.33<br>(-3.79, 1.12)                | 0.286        |
| <b>Pain in other parts</b>     | <b>-8.44</b><br><b>(-10.38, -6.49)</b> | <b>-3.88</b><br><b>(-5.91, -1.86)</b> | <b>-4.55</b><br><b>(-7.37, -1.74)</b> | <b>0.002</b> |

\*A difference higher than 0 Favors furmonertinib for HRQoL and functioning scales; difference lower than 0 Favors furmonertinib for symptom scales.

CI=confidence interval. EORTC=European Organization for Research and Treatment of Cancer. QLQ-C30=Quality-of-Life Questionnaire Core 30. HRQoL=health-related quality of life. QLQ-LC13=Quality-of-Life Questionnaire Lung cancer 13.



**Supplementary Table 4: Adjusted least square mean changes between last PRO assessment and baseline in patients who discontinued treatment (assessment was taken at day 7 after the final dose)**

|                               | Least square mean changes from baseline<br>(95% CI) |                                      | Adjusted between group difference*<br>(95% CI) | p-value      |
|-------------------------------|-----------------------------------------------------|--------------------------------------|------------------------------------------------|--------------|
|                               | Furmonertinib<br>(N=86)                             | Gefitinib<br>(N=130)                 |                                                |              |
| <b>EORTC QLQ-C30</b>          |                                                     |                                      |                                                |              |
| <b>HRQoL</b>                  | -2.96<br>(-6.80, 0.87)                              | -4.30<br>(-7.66, -0.94)              | 1.34 (-3.76, 6.43)                             | 0.606        |
| <b>Physical functioning</b>   | -1.03<br>(-4.43, 2.37)                              | -2.47<br>(-5.46, 0.52)               | 1.44 (-3.10, 5.98)                             | 0.533        |
| <b>Role functioning</b>       | -4.95<br>(-8.80, -1.11)                             | -3.72<br>(-7.06, -0.37)              | -1.23 (-6.33, 3.86)                            | 0.634        |
| <b>Emotional functioning</b>  | 0.29<br>(-2.46, 3.04)                               | -0.62<br>(-3.06, 1.82)               | 0.91 (-2.76, 4.58)                             | 0.627        |
| <b>Cognitive functioning</b>  | -3.48<br>(-6.74, -0.23)                             | -3.92<br>(-6.70, -1.13)              | 0.44 (-3.84, 4.71)                             | 0.840        |
| <b>Social functioning</b>     | -5.88<br>(-10.07, -1.70)                            | -4.93<br>(-8.59, -1.26)              | -0.96 (-6.51, 4.60)                            | 0.735        |
| <b>Fatigue</b>                | 0.00<br>(-3.89, 3.88)                               | -1.65<br>(-5.04, 1.74)               | 1.64 (-3.52, 6.81)                             | 0.532        |
| <b>Nausea/vomiting</b>        | 0.80<br>(-2.36, 3.96)                               | 2.56<br>(-0.11, 5.23)                | -1.76 (-5.89, 2.38)                            | 0.403        |
| <b>Pain</b>                   | -1.17<br>(-4.94, 2.60)                              | -0.47<br>(-3.69, 2.76)               | -0.70 (-5.68, 4.28)                            | 0.781        |
| <b>Dyspnoea</b>               | <b>-5.95</b><br><b>(-9.86, -2.04)</b>               | <b>-0.78</b><br><b>(-4.12, 2.56)</b> | <b>-5.17 (-10.30, -0.05)</b>                   | <b>0.048</b> |
| <b>Insomnia</b>               | -4.08<br>(-8.01, -0.15)                             | -4.09<br>(-7.37, -0.81)              | 0.01 (-5.10, 5.12)                             | 0.998        |
| <b>Appetite loss</b>          | 2.30<br>(-1.66, 6.26)                               | 2.52<br>(-0.94, 5.98)                | -0.22 (-5.47, 5.03)                            | 0.934        |
| <b>Constipation</b>           | -0.28<br>(-3.56, 2.99)                              | -0.07<br>(-2.84, 2.70)               | -0.21 (-4.50, 4.08)                            | 0.923        |
| <b>Diarrhoea</b>              | <b>1.26</b><br><b>(-1.43, 3.96)</b>                 | <b>4.91</b><br><b>(2.65, 7.17)</b>   | <b>-3.65 (-7.16, -0.13)</b>                    | <b>0.042</b> |
| <b>Financial difficulties</b> | -4.63<br>(-9.15, -0.11)                             | -2.11<br>(-6.12, 1.90)               | -2.52 (-8.57, 3.52)                            | 0.412        |
| <b>EORTC QLQ-L13</b>          |                                                     |                                      |                                                |              |
| <b>Dyspnoea</b>               | -2.88<br>(-6.36, 0.59)                              | -0.86<br>(-3.89, 2.17)               | -2.02 (-6.64, 2.59)                            | 0.389        |
| <b>Cough</b>                  | -10.08<br>(-14.34, -5.81)                           | -13.64<br>(-17.31, -9.97)            | 3.57 (-2.06, 9.19)                             | 0.213        |
| <b>Haemoptysis</b>            | -0.56<br>(-2.99, 1.87)                              | 0.40<br>(-1.65, 2.45)                | -0.96 (-4.14, 2.22)                            | 0.553        |

|                                |                                      |                                    |                             |              |
|--------------------------------|--------------------------------------|------------------------------------|-----------------------------|--------------|
| <b>Sore mouth</b>              | 1.09<br>(-1.66, 3.84)                | 2.34<br>(-0.11, 4.80)              | -1.26 (-4.94, 2.43)         | 0.503        |
| <b>Dysphagia</b>               | -0.51<br>(-3.16, 2.14)               | 1.98<br>(-0.31, 4.26)              | -2.49 (-5.99, 1.01)         | 0.163        |
| <b>Peripheral neuropathy</b>   | -0.75<br>(-4.03, 2.53)               | -0.92<br>(-3.73, 1.89)             | 0.17 (-4.15, 4.49)          | 0.938        |
| <b>Alopecia</b>                | <b>-1.81</b><br><b>(-4.61, 0.98)</b> | <b>3.21</b><br><b>(0.84, 5.58)</b> | <b>-5.02 (-8.69, -1.35)</b> | <b>0.008</b> |
| <b>Chest pain</b>              | -5.80<br>(-9.70, -1.91)              | -5.07<br>(-8.37, -1.76)            | -0.74 (-5.84, 4.37)         | 0.776        |
| <b>Pain in arm or shoulder</b> | -5.06<br>(-8.80, -1.32)              | -3.18<br>(-6.37, 0.02)             | -1.88 (-6.81, 3.04)         | 0.452        |
| <b>Pain in other parts</b>     | -2.63<br>(-6.68, 1.42)               | -1.83<br>(-5.29, 1.62)             | -0.80 (-6.13, 4.54)         | 0.769        |

\*A difference higher than 0 Favors furmonertinib for HRQoL and functioning scales; difference lower than 0 Favors furmonertinib for symptom scales.

PRO=patient-reported outcomes. CI=confidence interval. EORTC=European Organization for Research and Treatment of Cancer. QLQ-C30=Quality-of-Life Questionnaire Core 30. HRQoL=health-related quality of life. QLQ-LC13=Quality-of-Life Questionnaire Lung cancer 13.

## **Supplementary Figure 1: Changes in other functioning, symptom and financial difficulty from baseline to week 90**

Data are mean change in mixed model for repeated measures-adjusted scores (95% CI). Data are (A) physical functioning, (B) role functioning, (C) emotional functioning, (D) cognitive functioning, (E) social functioning, (F) fatigue, (G) nausea/vomiting, (H) pain, (I) dyspnoea, (J) insomnia, (K) appetite loss, (L) constipation, (M) diarrhoea, (N) financial difficulties; all from the EORTC QLQ-C30, and (O) dyspnoea, (P) haemoptysis, (Q) sore mouth, (R) dysphagia, (S) peripheral neuropathy, (T) alopecia, (U) pain in armor shoulder, (V) pain in other parts; all from the EORTC QLQ-LC13.

EORTC=European Organization for Research and Treatment of Cancer. QLQ-C30=Quality-of-Life Questionnaire Core 30. QLQ-LC13=Quality-of-Life Questionnaire Lung cancer 13.

**A**

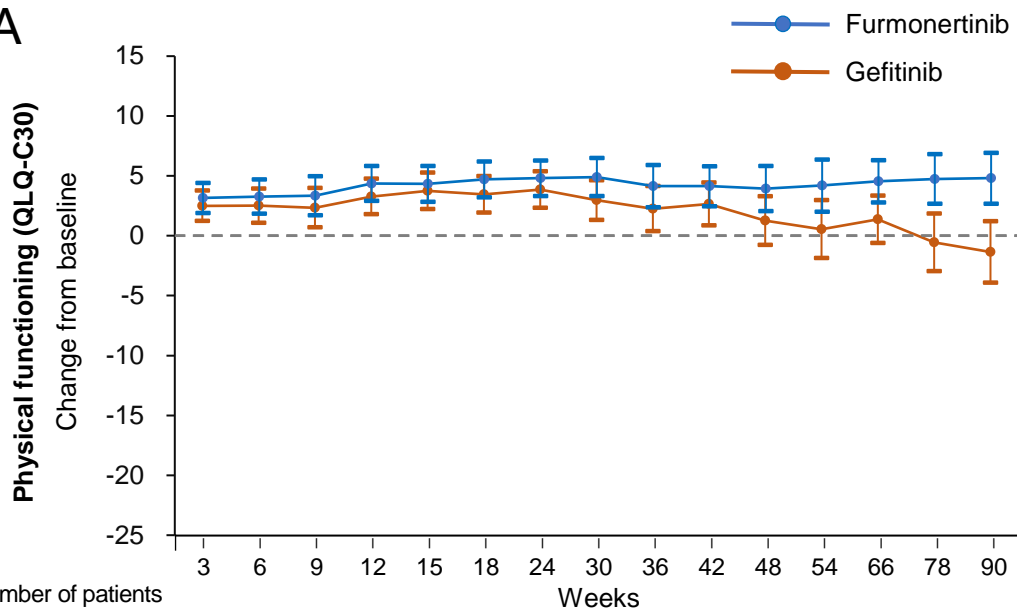

Number of patients

|               |     |     |     |     |     |     |     |     |     |     |     |     |     |    |    |
|---------------|-----|-----|-----|-----|-----|-----|-----|-----|-----|-----|-----|-----|-----|----|----|
| Furmonertinib | 176 | 175 | 166 | 161 | 153 | 150 | 151 | 143 | 138 | 132 | 127 | 117 | 110 | 94 | 83 |
| Gefitinib     | 177 | 175 | 165 | 158 | 147 | 147 | 136 | 124 | 110 | 101 | 90  | 80  | 66  | 49 | 34 |

**B**

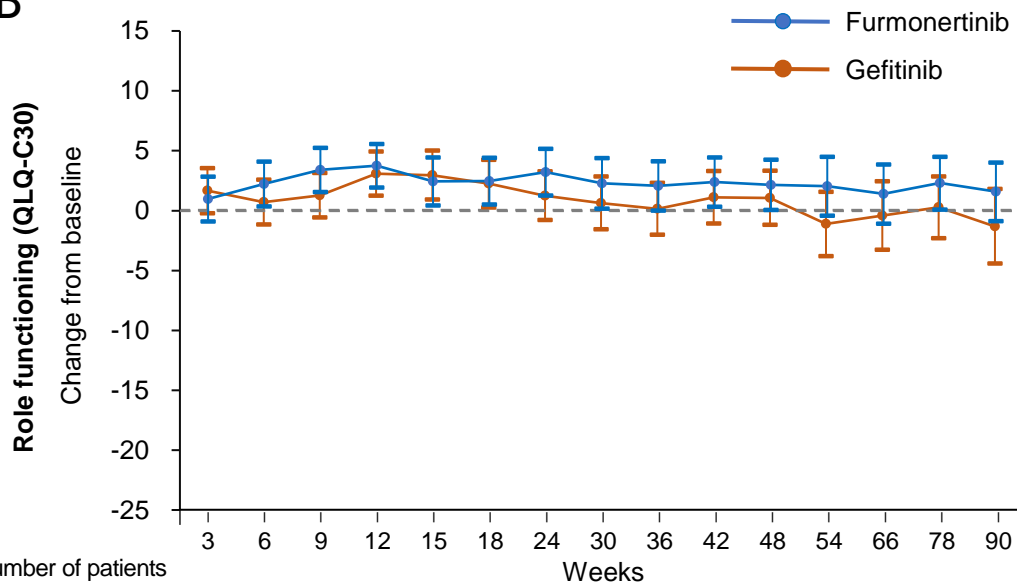

Number of patients

|               |     |     |     |     |     |     |     |     |     |     |     |     |     |    |    |
|---------------|-----|-----|-----|-----|-----|-----|-----|-----|-----|-----|-----|-----|-----|----|----|
| Furmonertinib | 176 | 175 | 166 | 161 | 153 | 150 | 151 | 143 | 138 | 132 | 127 | 117 | 110 | 94 | 83 |
| Gefitinib     | 177 | 175 | 165 | 158 | 147 | 147 | 136 | 124 | 110 | 101 | 90  | 80  | 66  | 49 | 34 |

C

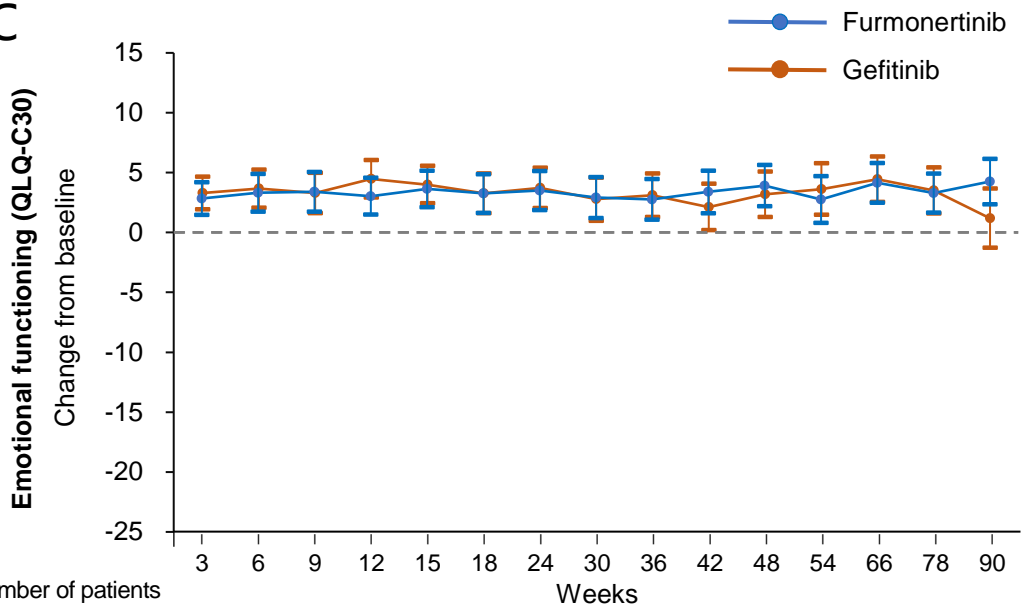

Number of patients

|               |     |     |     |     |     |     |     |     |     |     |     |     |     |    |    |
|---------------|-----|-----|-----|-----|-----|-----|-----|-----|-----|-----|-----|-----|-----|----|----|
| Furmonertinib | 176 | 175 | 166 | 161 | 153 | 150 | 151 | 143 | 138 | 132 | 127 | 117 | 110 | 94 | 83 |
| Gefitinib     | 177 | 175 | 165 | 158 | 147 | 147 | 136 | 124 | 110 | 101 | 90  | 80  | 66  | 49 | 34 |

D

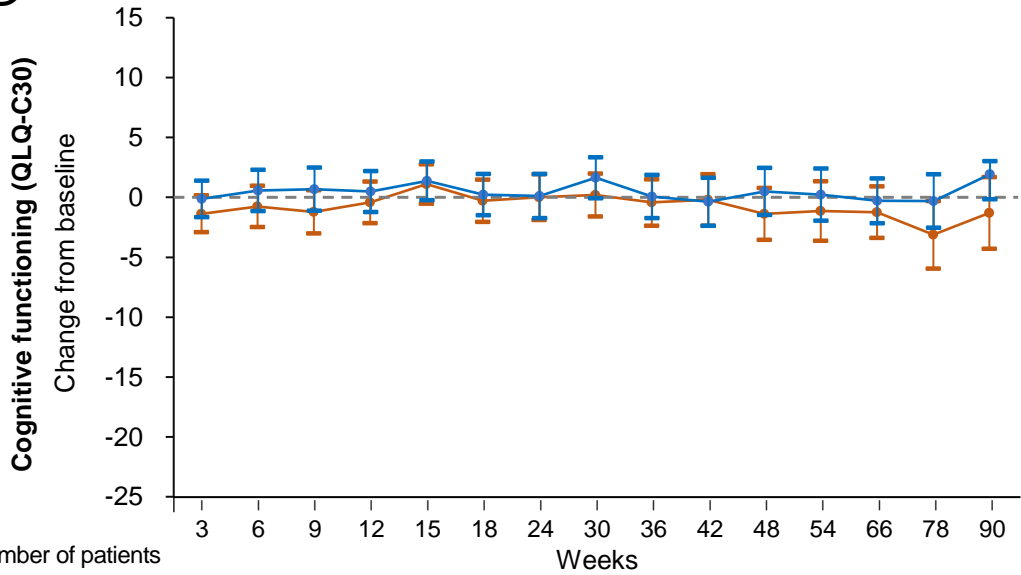

Number of patients

|               |     |     |     |     |     |     |     |     |     |     |     |     |     |    |    |
|---------------|-----|-----|-----|-----|-----|-----|-----|-----|-----|-----|-----|-----|-----|----|----|
| Furmonertinib | 176 | 175 | 166 | 161 | 153 | 150 | 151 | 143 | 138 | 132 | 127 | 117 | 110 | 94 | 83 |
| Gefitinib     | 177 | 175 | 165 | 158 | 147 | 147 | 136 | 124 | 110 | 101 | 90  | 80  | 66  | 49 | 34 |

**F**

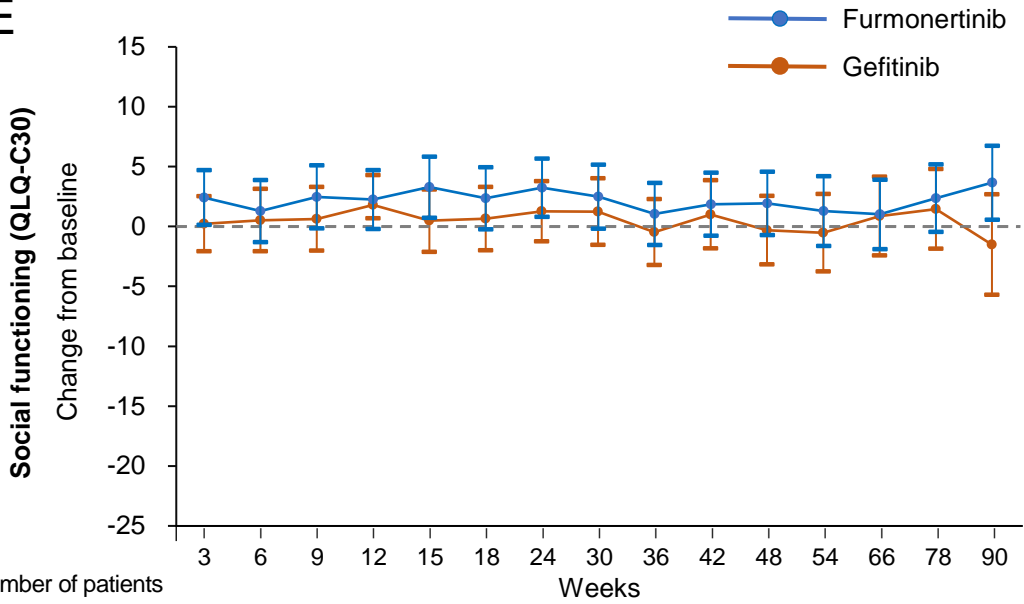

Number of patients

|               |     |     |     |     |     |     |     |     |     |     |     |     |     |    |    |
|---------------|-----|-----|-----|-----|-----|-----|-----|-----|-----|-----|-----|-----|-----|----|----|
| Furmonertinib | 176 | 175 | 166 | 161 | 153 | 150 | 151 | 143 | 138 | 132 | 127 | 117 | 110 | 94 | 83 |
| Gefitinib     | 177 | 175 | 165 | 158 | 147 | 147 | 136 | 124 | 110 | 101 | 90  | 80  | 66  | 49 | 34 |

**F**

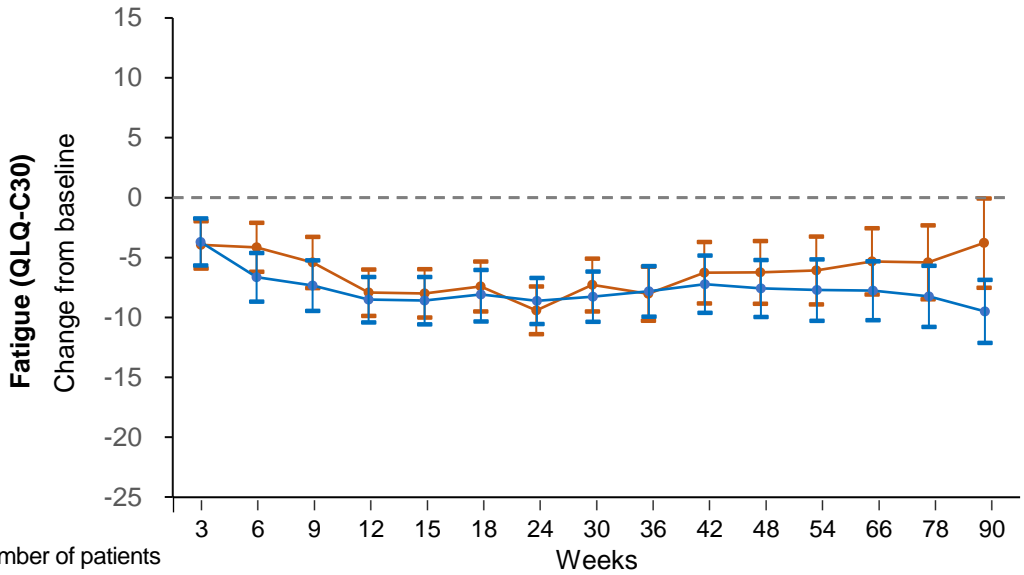

Number of patients

|               |     |     |     |     |     |     |     |     |     |     |     |     |     |    |    |
|---------------|-----|-----|-----|-----|-----|-----|-----|-----|-----|-----|-----|-----|-----|----|----|
| Furmonertinib | 176 | 175 | 166 | 161 | 153 | 150 | 151 | 143 | 138 | 132 | 127 | 117 | 110 | 94 | 83 |
| Gefitinib     | 177 | 175 | 165 | 158 | 147 | 147 | 136 | 124 | 110 | 101 | 90  | 80  | 66  | 49 | 34 |

**G**

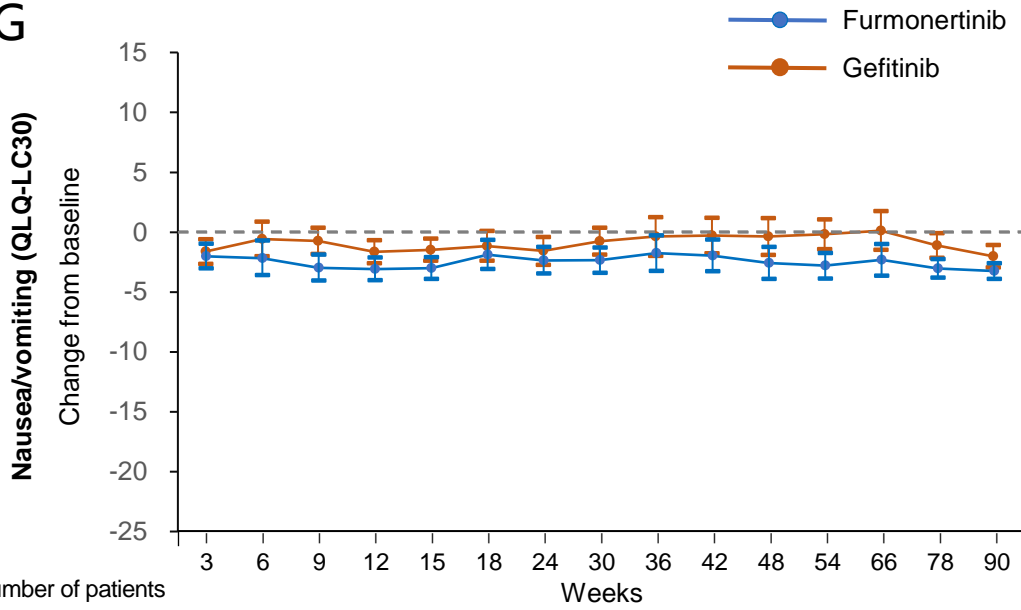

Number of patients

Furmonertinib

176 175 166 161 153 150 151 143 138 132 127 117 110 94 83

Gefitinib

177 175 165 158 147 147 136 124 110 101 90 80 66 49 34

**H**

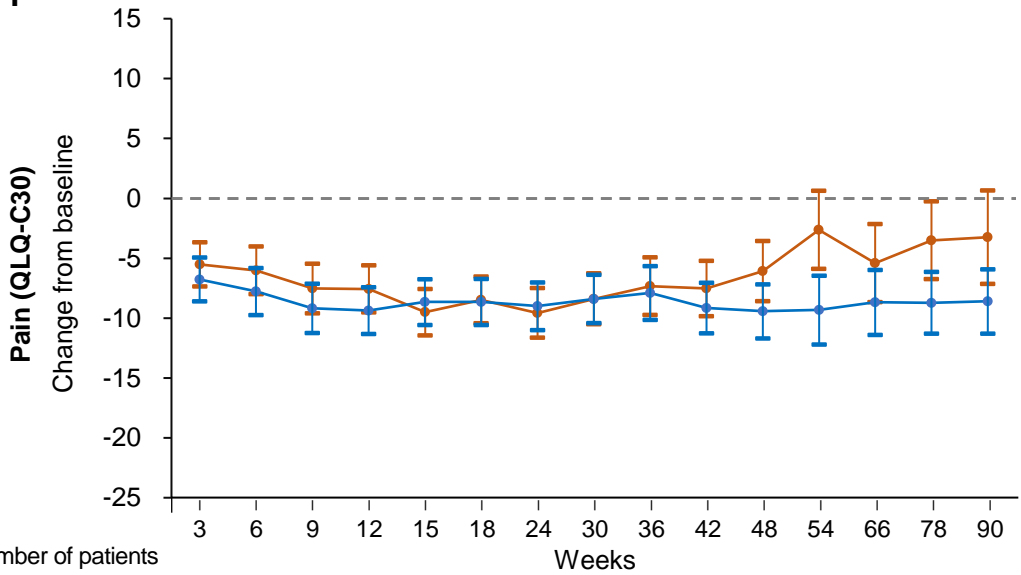

Number of patients

Furmonertinib

176 175 166 161 153 150 151 143 138 132 127 117 110 94 83

Gefitinib

177 175 165 158 147 147 136 124 110 101 90 80 66 49 34

I

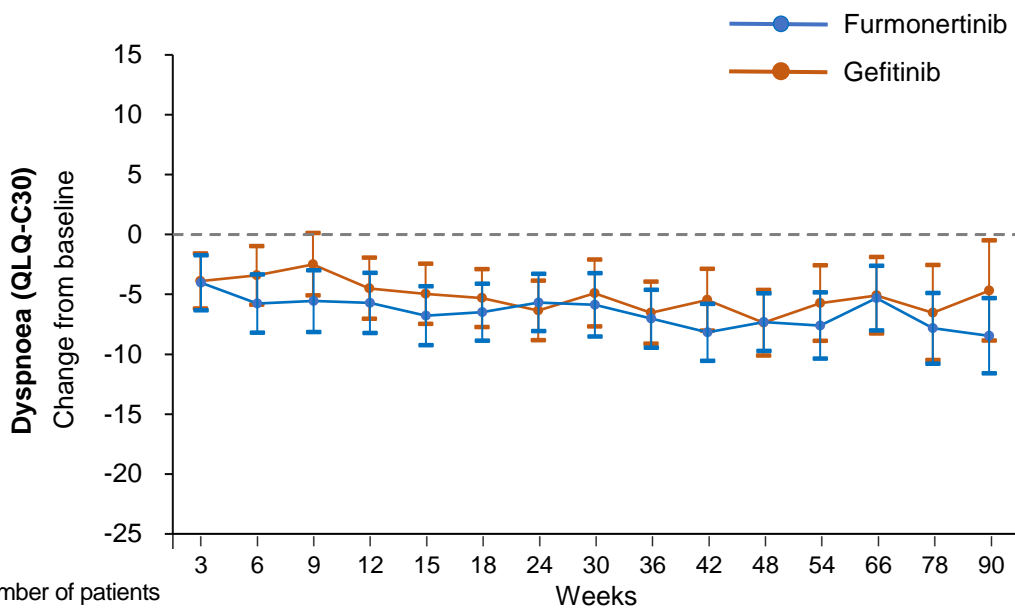

Number of patients

Furmonertinib

Gefitinib

J

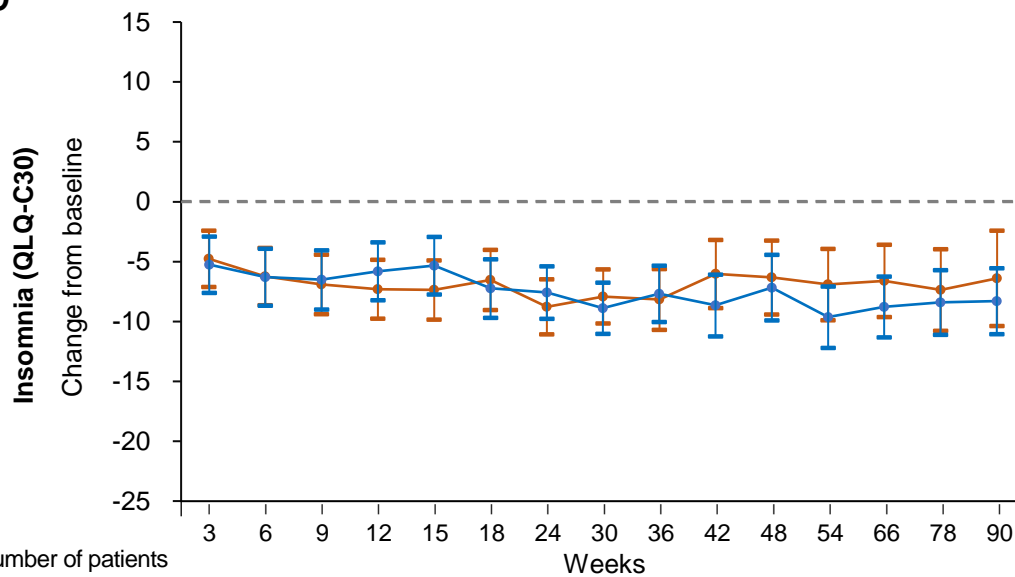

Number of patients

Furmonertinib

Gefitinib



**K**

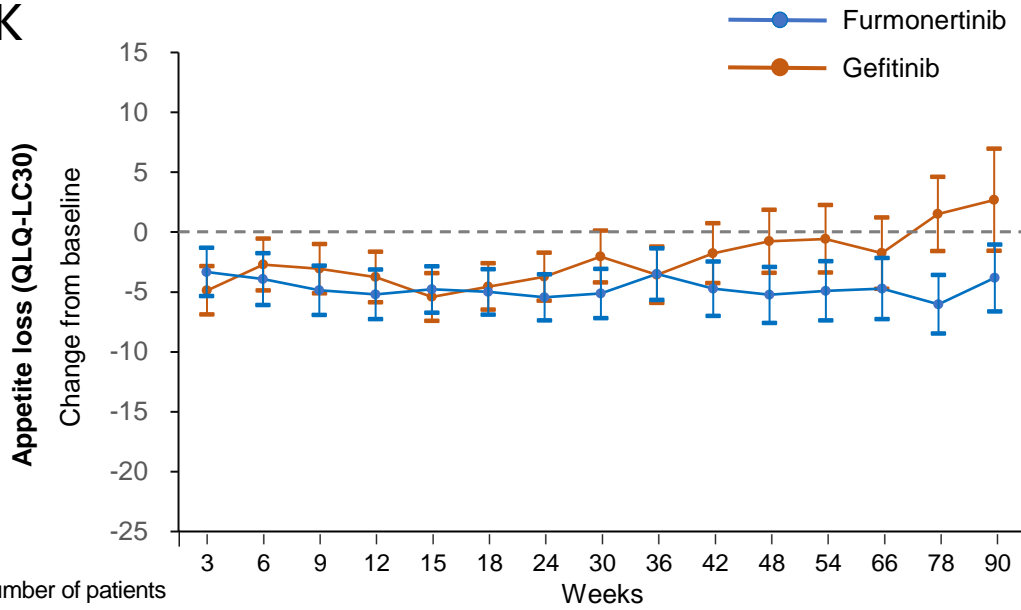

Number of patients

Furmonertinib

176 175 166 161 153 150 151 143 138 132 127 117 110 94 83

Gefitinib

177 175 165 158 147 147 136 124 110 101 90 80 66 49 34

**L**

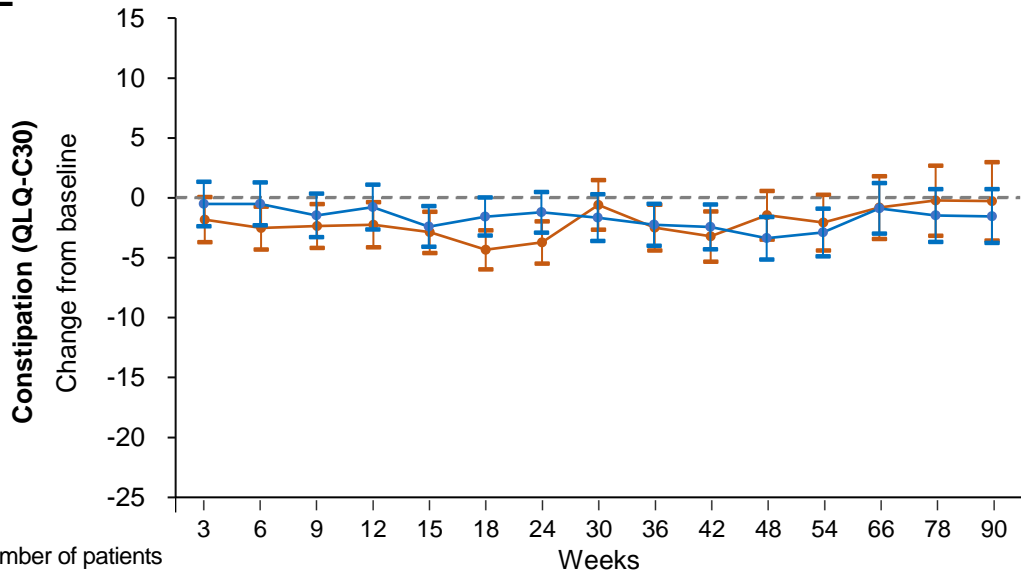

Number of patients

Furmonertinib

176 175 166 161 153 150 151 143 138 132 127 117 110 94 83

Gefitinib

177 175 165 158 147 147 136 124 110 101 90 80 66 49 34

M

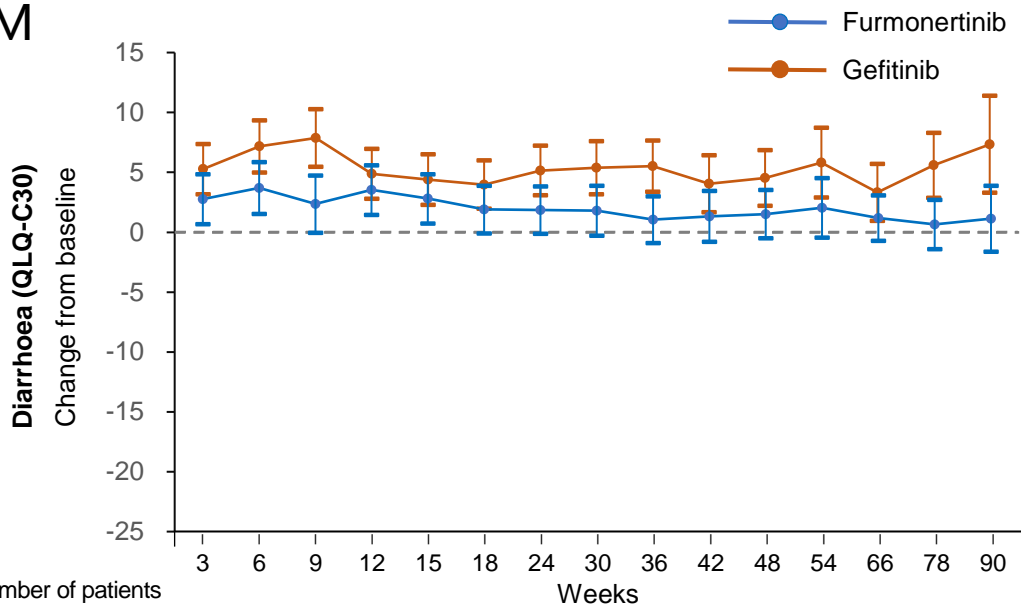

Number of patients

Furmonertinib

176

175

166

161

153

150

151

143

138

132

127

117

110

94

83

Gefitinib

177

175

165

158

147

147

136

124

110

101

90

80

66

49

34

N

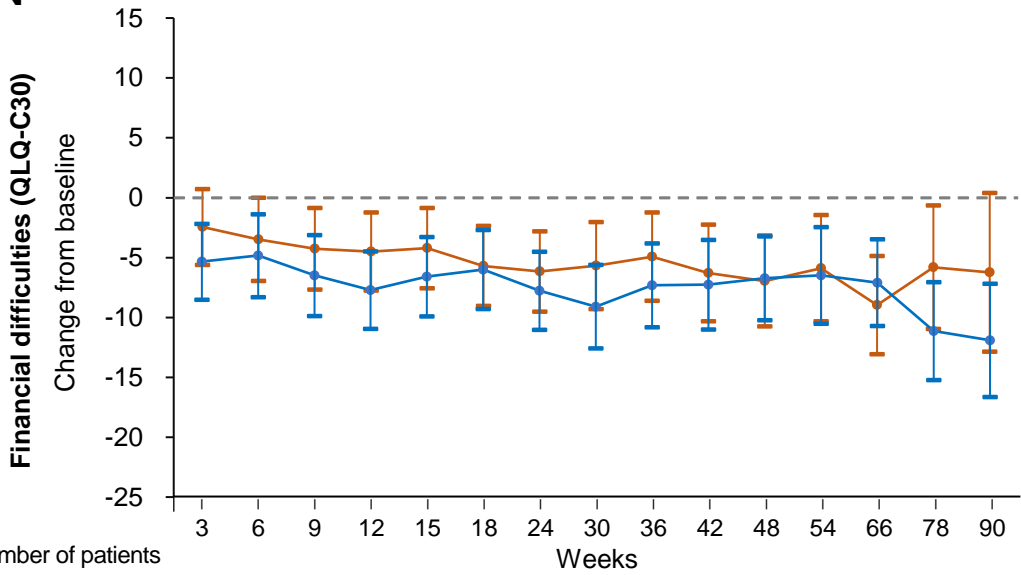

Number of patients

Furmonertinib

176

175

166

161

153

150

151

143

138

132

127

117

110

94

83

Gefitinib

177

175

165

158

147

147

136

124

110

101

90

80

66

49

34

O

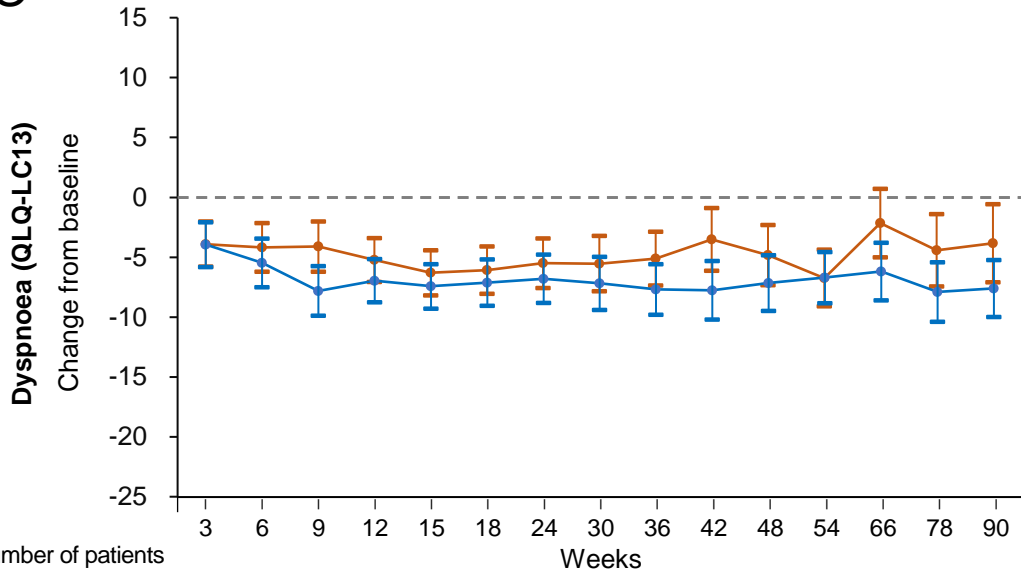

Number of patients

|               |     |     |     |     |     |     |     |     |     |     |     |     |     |    |    |
|---------------|-----|-----|-----|-----|-----|-----|-----|-----|-----|-----|-----|-----|-----|----|----|
| Furmonertinib | 176 | 175 | 166 | 161 | 153 | 150 | 151 | 143 | 138 | 132 | 127 | 117 | 110 | 94 | 83 |
| Gefitinib     | 177 | 175 | 165 | 158 | 147 | 146 | 136 | 123 | 110 | 101 | 90  | 79  | 66  | 49 | 34 |

P

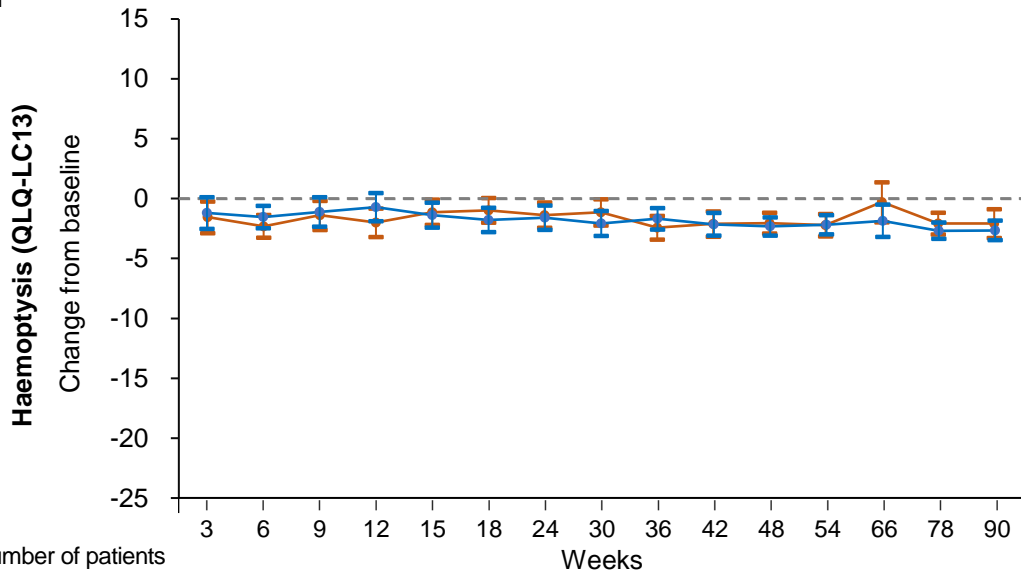

Number of patients

|               |     |     |     |     |     |     |     |     |     |     |     |     |     |    |    |
|---------------|-----|-----|-----|-----|-----|-----|-----|-----|-----|-----|-----|-----|-----|----|----|
| Furmonertinib | 176 | 175 | 166 | 161 | 153 | 150 | 151 | 143 | 138 | 132 | 127 | 117 | 110 | 94 | 83 |
| Gefitinib     | 177 | 175 | 165 | 158 | 147 | 146 | 136 | 123 | 110 | 101 | 90  | 79  | 66  | 49 | 34 |

Q

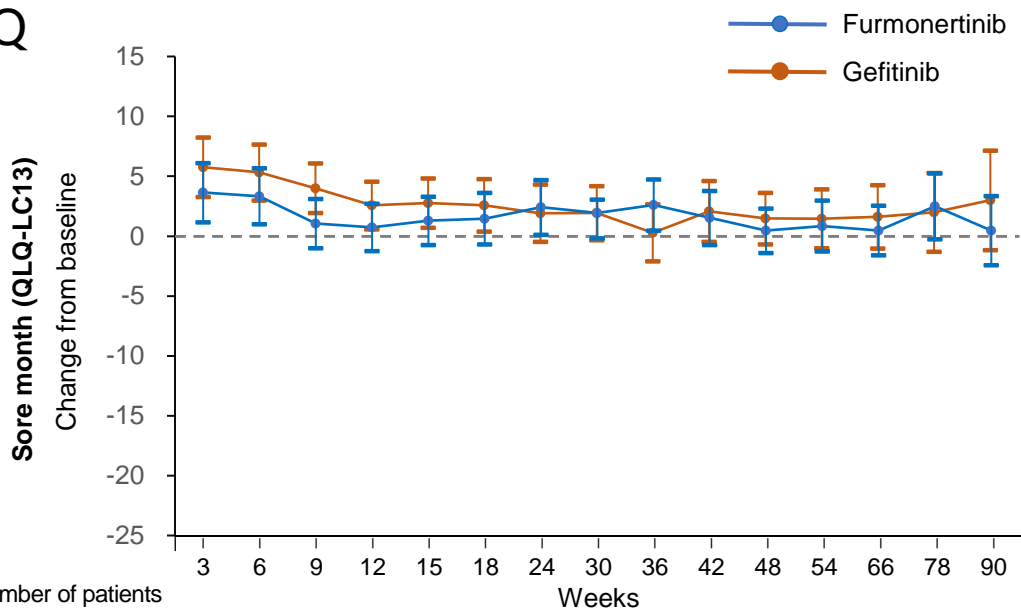

Number of patients

|               |     |     |     |     |     |     |     |     |     |     |     |     |     |    |    |
|---------------|-----|-----|-----|-----|-----|-----|-----|-----|-----|-----|-----|-----|-----|----|----|
| Furmonertinib | 176 | 175 | 166 | 161 | 153 | 150 | 151 | 143 | 138 | 132 | 127 | 117 | 110 | 94 | 83 |
| Gefitinib     | 177 | 175 | 165 | 158 | 147 | 146 | 136 | 123 | 110 | 101 | 90  | 79  | 66  | 49 | 34 |

R

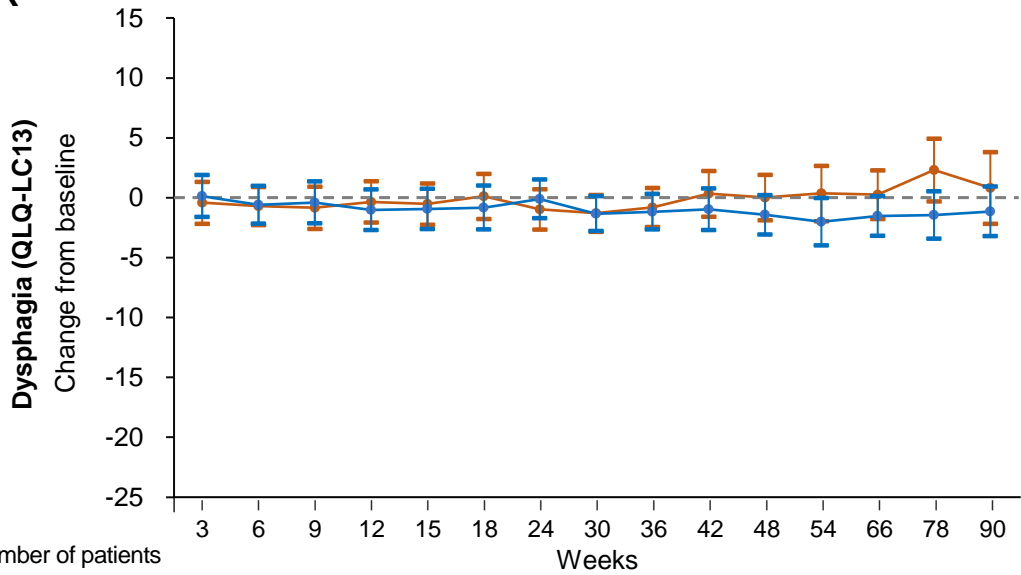

Number of patients

|               |     |     |     |     |     |     |     |     |     |     |     |     |     |    |    |
|---------------|-----|-----|-----|-----|-----|-----|-----|-----|-----|-----|-----|-----|-----|----|----|
| Furmonertinib | 176 | 175 | 166 | 161 | 153 | 150 | 151 | 143 | 138 | 132 | 127 | 117 | 110 | 94 | 83 |
| Gefitinib     | 177 | 175 | 165 | 158 | 147 | 146 | 136 | 123 | 110 | 101 | 90  | 79  | 66  | 49 | 34 |

S

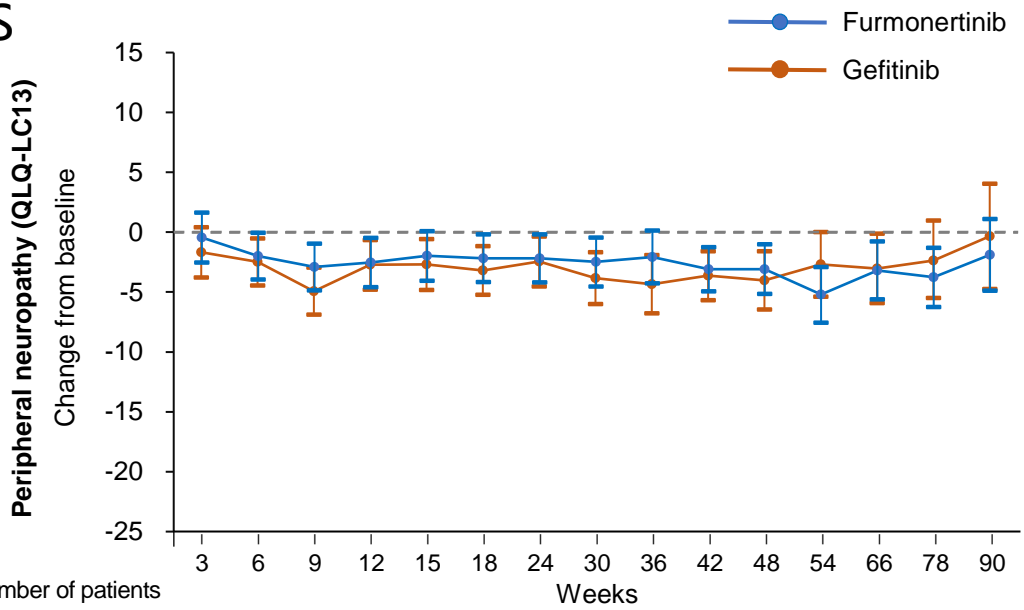

Number of patients

|               |     |     |     |     |     |     |     |     |     |     |     |     |     |    |    |
|---------------|-----|-----|-----|-----|-----|-----|-----|-----|-----|-----|-----|-----|-----|----|----|
| Furmonertinib | 176 | 175 | 166 | 161 | 153 | 150 | 151 | 143 | 138 | 132 | 127 | 117 | 110 | 94 | 83 |
| Gefitinib     | 177 | 175 | 165 | 158 | 147 | 146 | 136 | 123 | 110 | 101 | 90  | 79  | 66  | 49 | 34 |

T

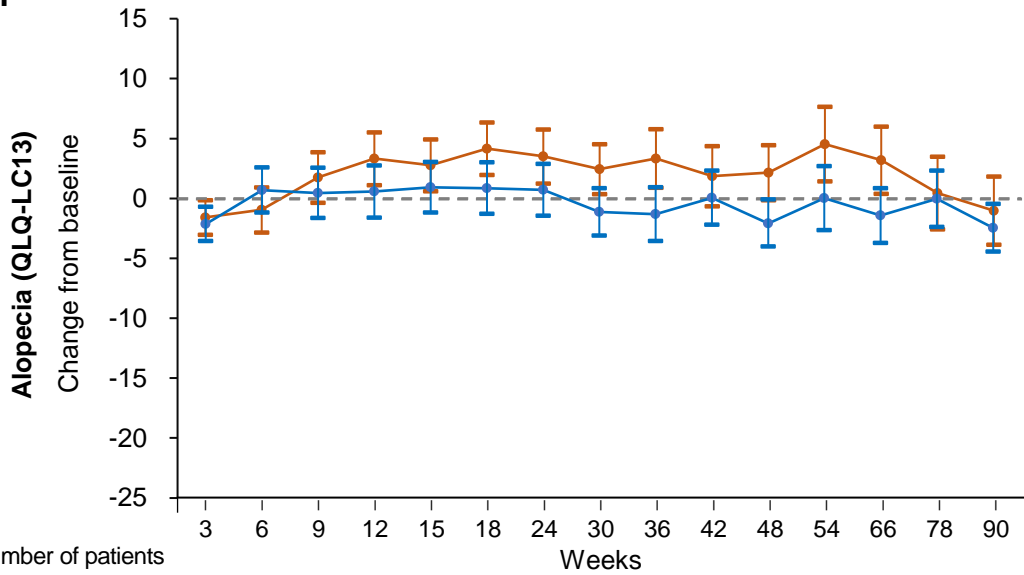

Number of patients

|               |     |     |     |     |     |     |     |     |     |     |     |     |     |    |    |
|---------------|-----|-----|-----|-----|-----|-----|-----|-----|-----|-----|-----|-----|-----|----|----|
| Furmonertinib | 176 | 175 | 166 | 161 | 153 | 150 | 151 | 143 | 138 | 132 | 127 | 117 | 110 | 94 | 83 |
| Gefitinib     | 177 | 175 | 165 | 158 | 147 | 146 | 136 | 123 | 110 | 101 | 90  | 79  | 66  | 49 | 34 |

**U**

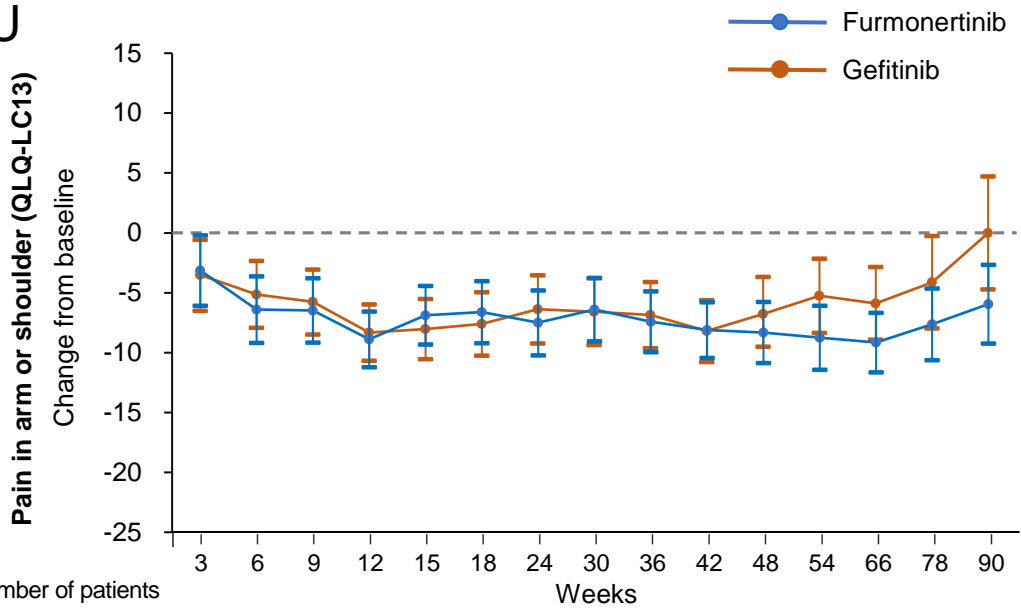

Number of patients

|               |     |     |     |     |     |     |     |     |     |     |     |     |     |    |    |
|---------------|-----|-----|-----|-----|-----|-----|-----|-----|-----|-----|-----|-----|-----|----|----|
| Furmonertinib | 176 | 175 | 166 | 161 | 153 | 150 | 151 | 143 | 138 | 132 | 127 | 117 | 110 | 94 | 83 |
| Gefitinib     | 177 | 175 | 165 | 158 | 147 | 146 | 136 | 123 | 110 | 101 | 90  | 79  | 66  | 49 | 34 |

**V**

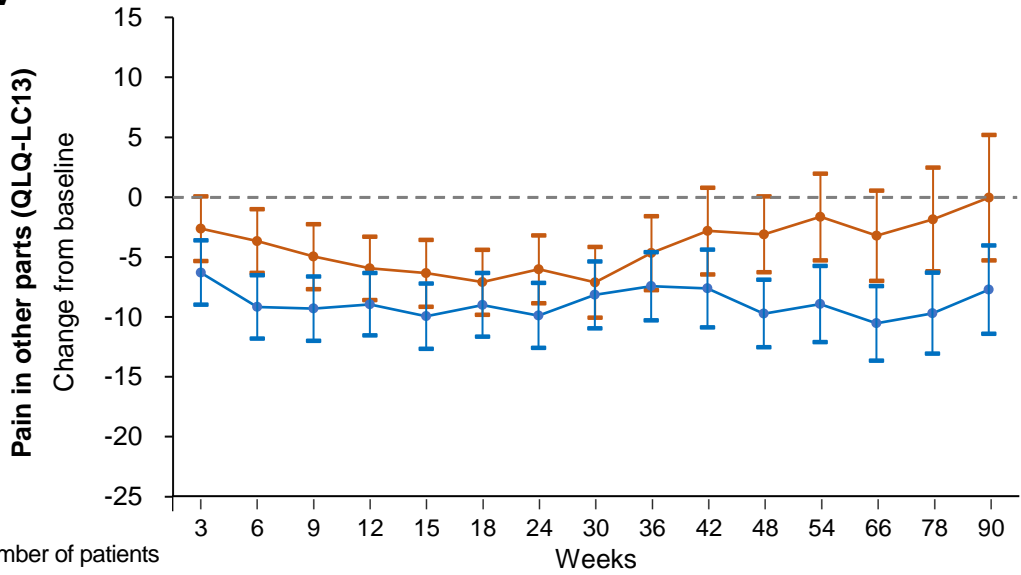

Number of patients

|               |     |     |     |     |     |     |     |     |     |     |     |     |     |    |    |
|---------------|-----|-----|-----|-----|-----|-----|-----|-----|-----|-----|-----|-----|-----|----|----|
| Furmonertinib | 176 | 175 | 166 | 161 | 153 | 150 | 151 | 143 | 138 | 132 | 127 | 117 | 110 | 94 | 83 |
| Gefitinib     | 177 | 175 | 165 | 158 | 147 | 146 | 136 | 123 | 110 | 101 | 90  | 79  | 66  | 49 | 34 |

## **Supplementary Figure 2: Kaplan-Meier curves of time to deterioration**

Data are (A) HRQoL, (B) physical functioning, (C) role functioning, (D) emotional functioning, (E) cognitive functioning, (F) social functioning, (G) fatigue, (H) nausea/vomiting, (I) pain, (J) dyspnoea, (K) insomnia, (L) appetite loss, (M) constipation, (N) diarrhoea, (O) financial difficulties; all from the EORTC QLQ-C30, and (P) dyspnoea, (Q) cough, (R) haemoptysis, (S) sore mouth, (T) dysphagia, (U) peripheral neuropathy, (V) alopecia, (W) chest pain, (X) pain in arm or shoulder, (Y) pain in other parts; all from the EORTC QLQ-LC13.

HRQoL=health-related quality of life. QLQ-C30=Quality-of-Life Questionnaire Core 30. QLQ-LC13=Quality-of-Life Questionnaire Lung cancer 13. NR=not reached. NA=not available. HR=hazard ratio. CI=confidence interval..

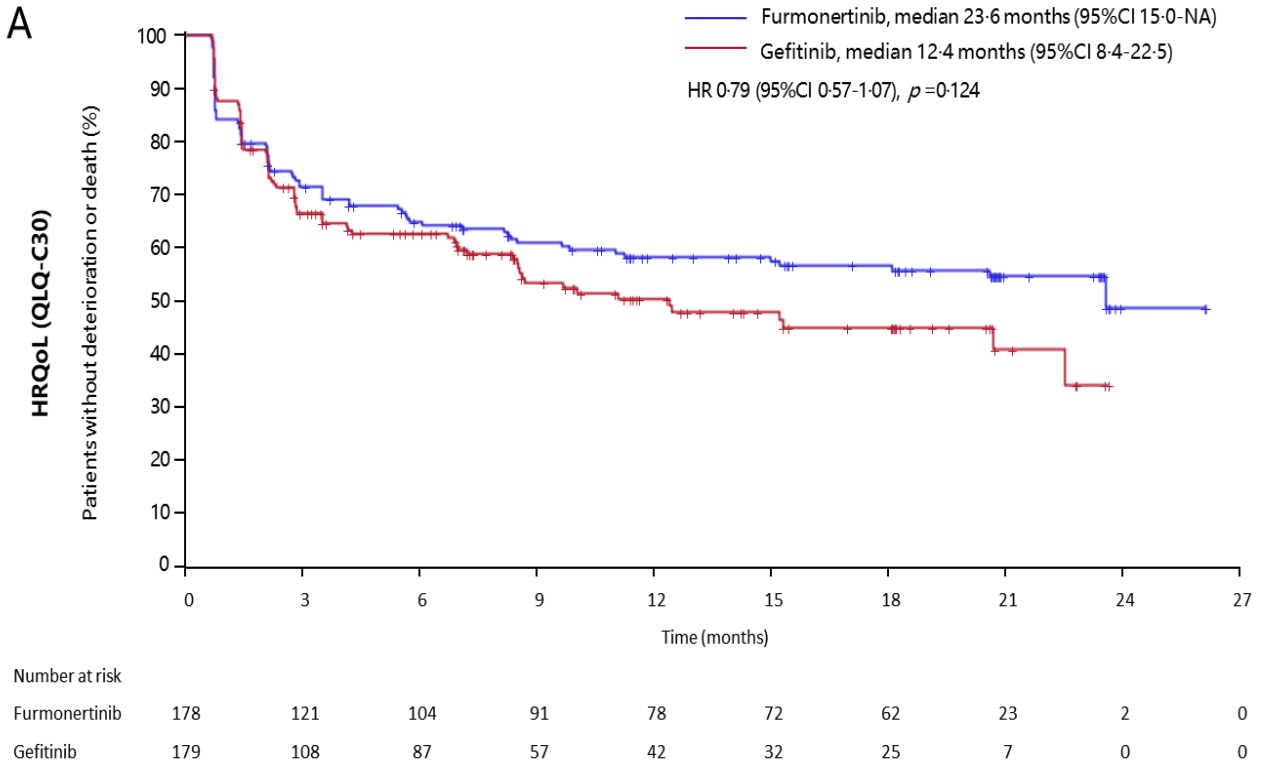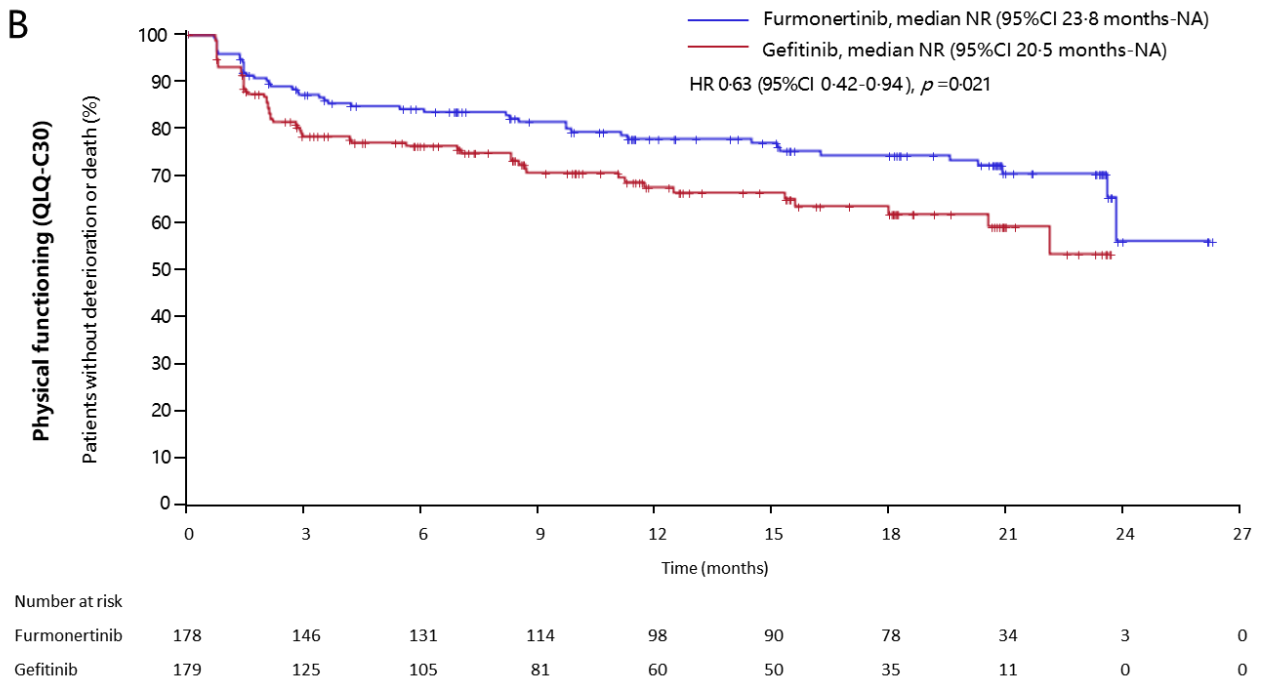



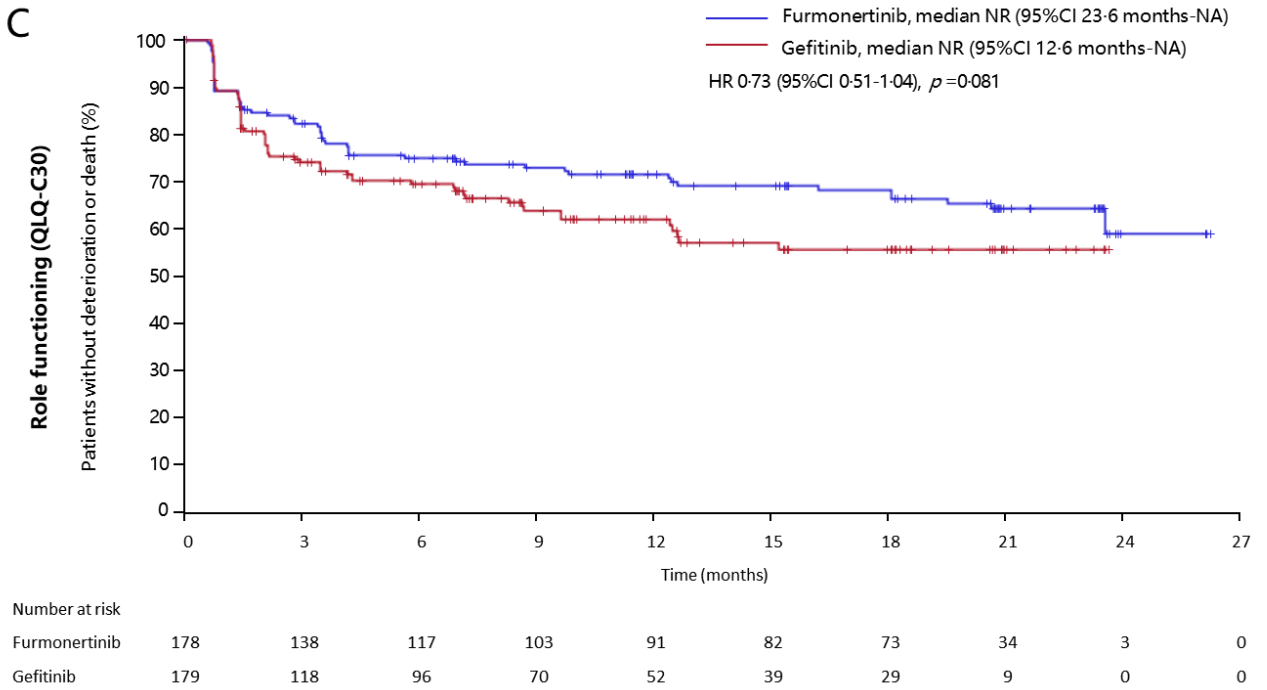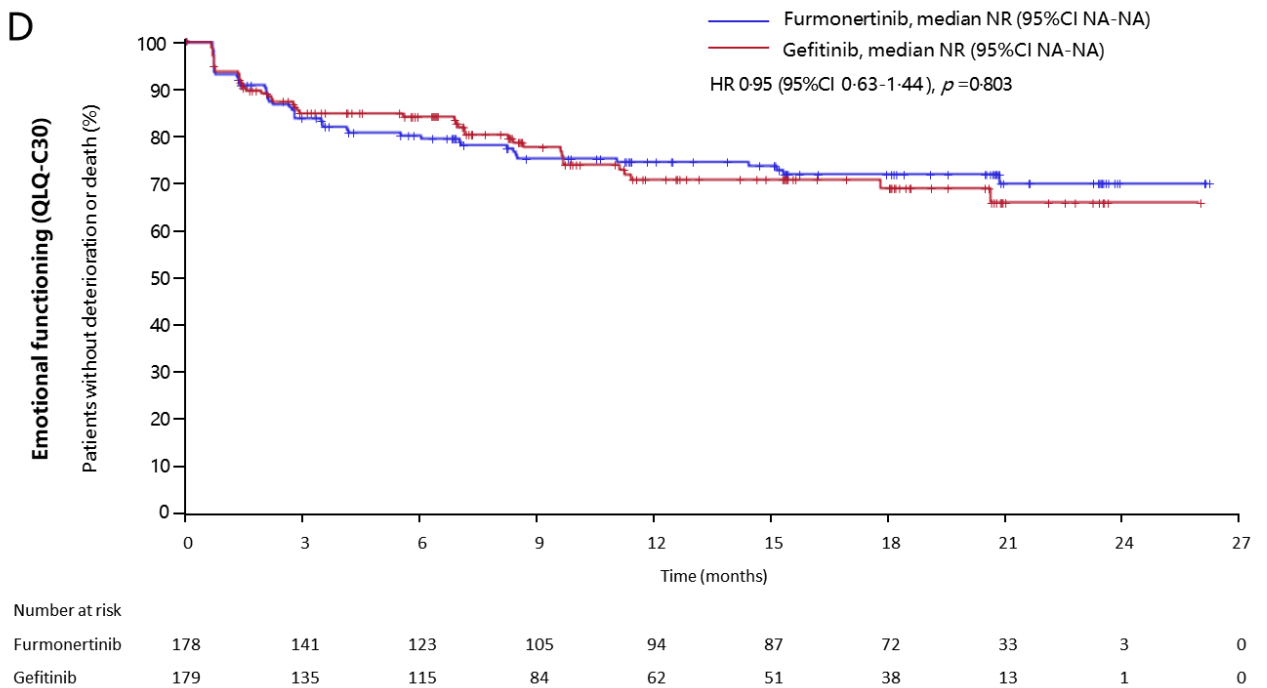

F

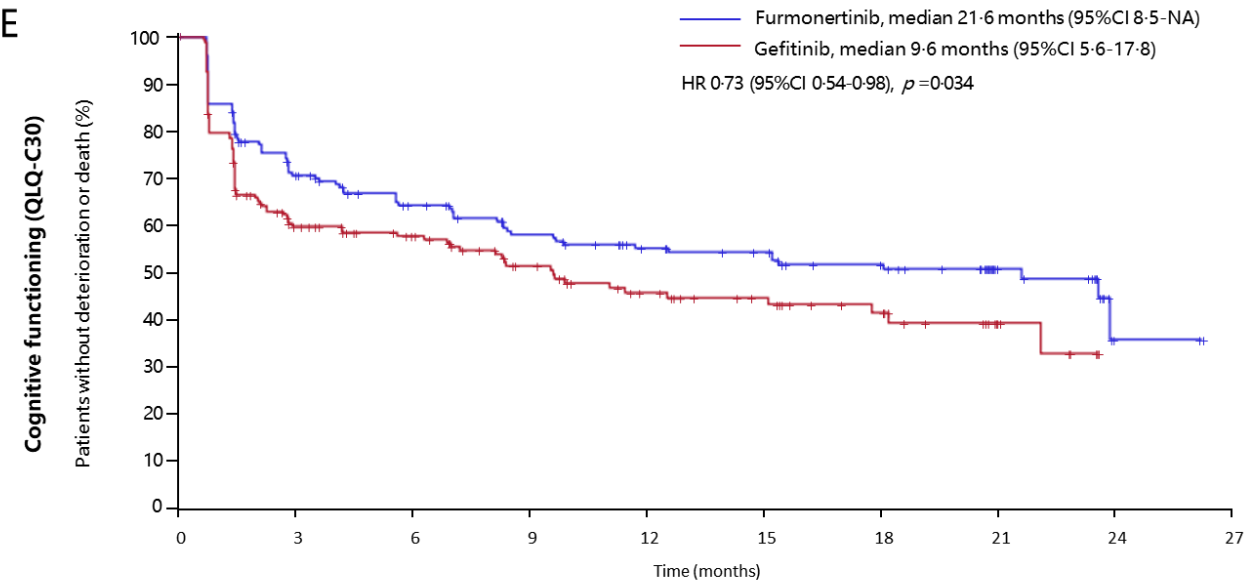

| Number at risk |     |     |    |    |    |    |    |    |   |   |
|----------------|-----|-----|----|----|----|----|----|----|---|---|
| Furmonertinib  | 178 | 116 | 97 | 82 | 70 | 64 | 54 | 24 | 2 | 0 |
| Gefitinib      | 179 | 94  | 78 | 58 | 42 | 33 | 23 | 7  | 0 | 0 |

F

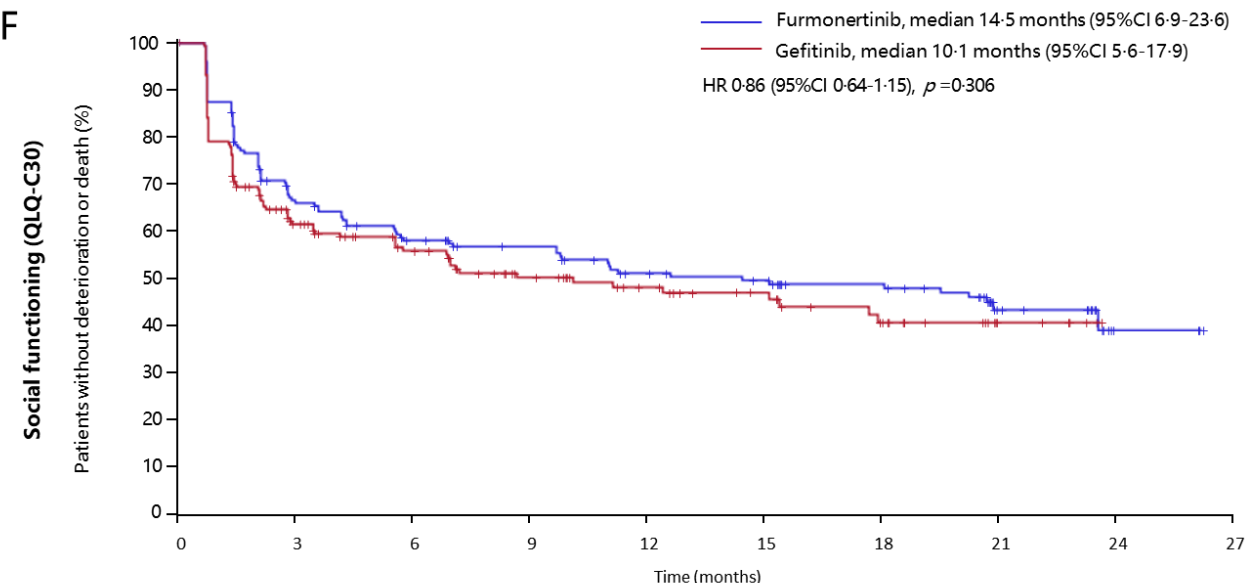

| Number at risk |     |     |    |    |    |    |    |    |   |   |
|----------------|-----|-----|----|----|----|----|----|----|---|---|
| Furmonertinib  | 178 | 110 | 92 | 82 | 69 | 64 | 55 | 23 | 3 | 0 |
| Gefitinib      | 179 | 95  | 74 | 55 | 43 | 33 | 23 | 7  | 0 | 0 |

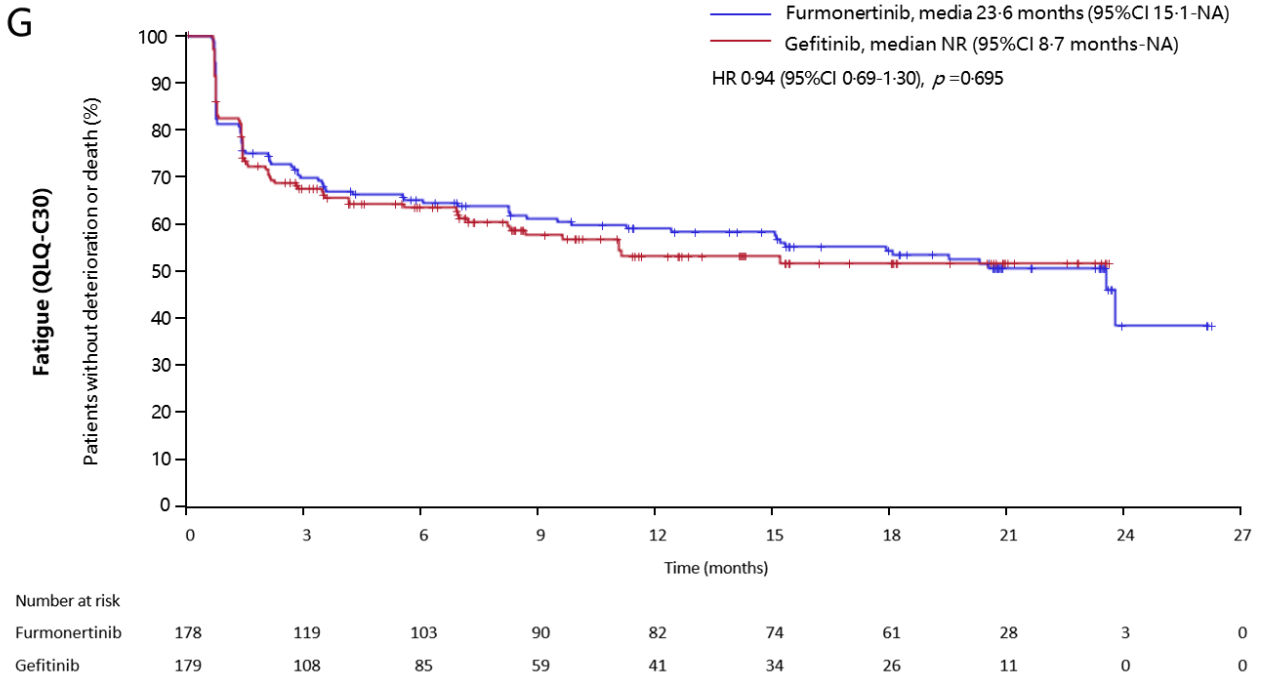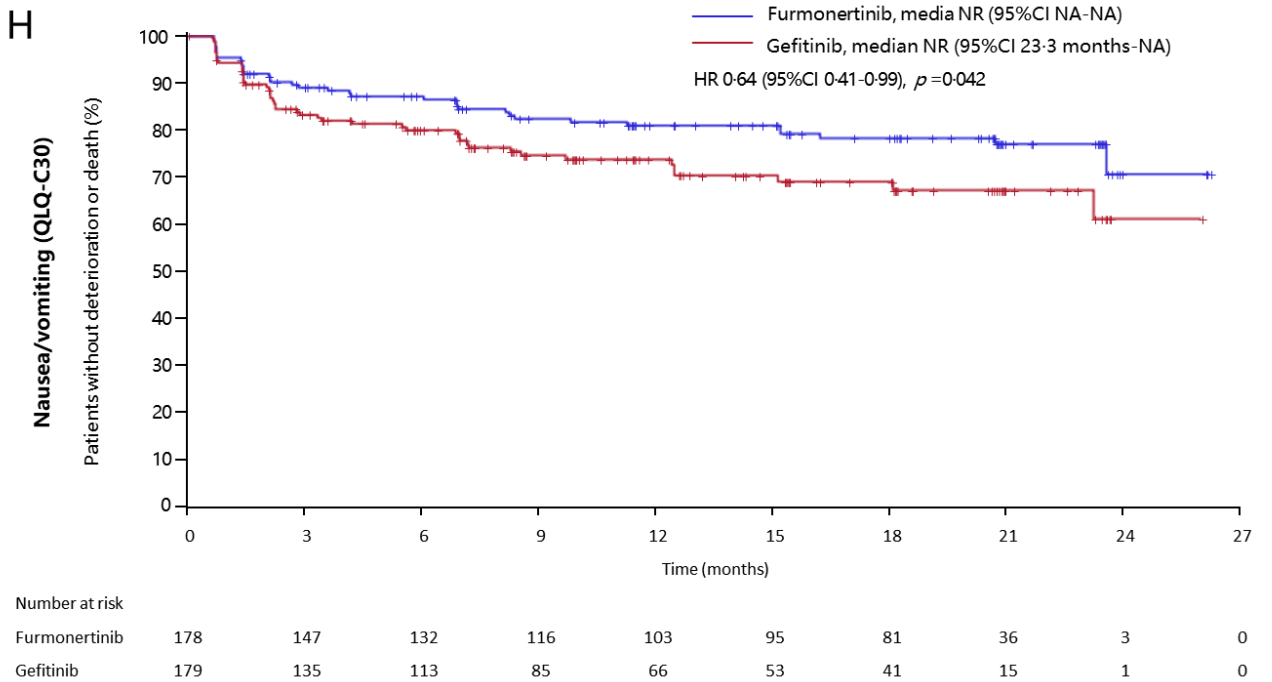

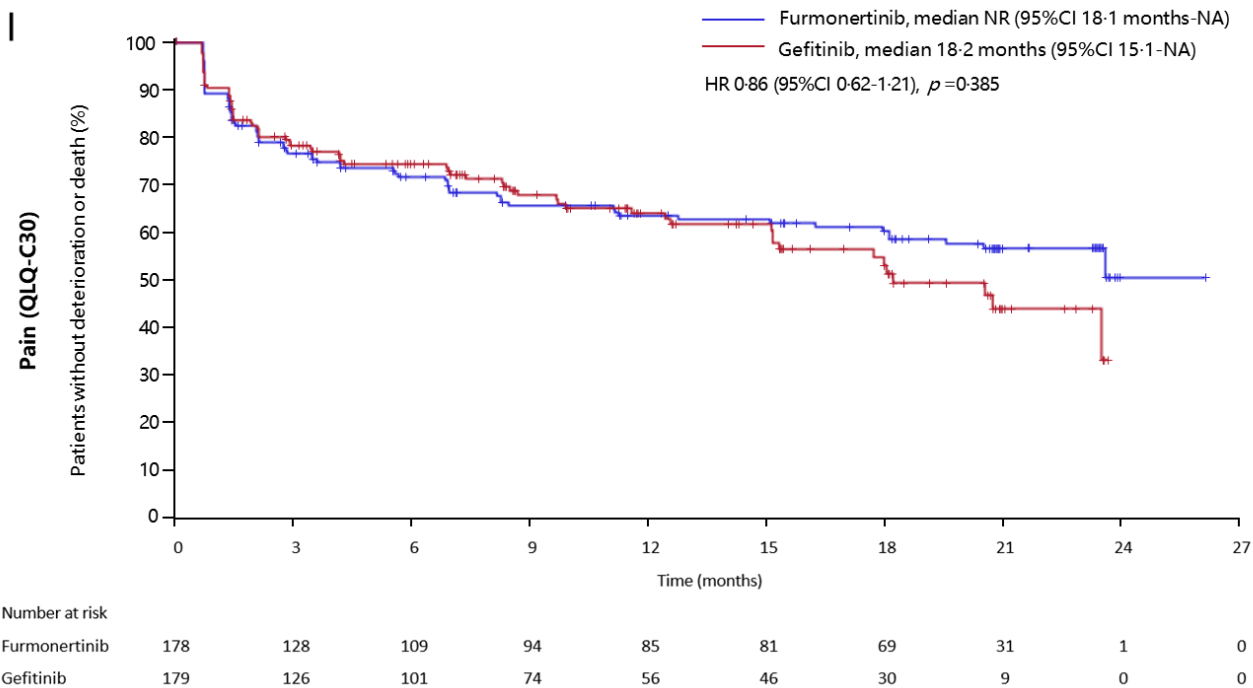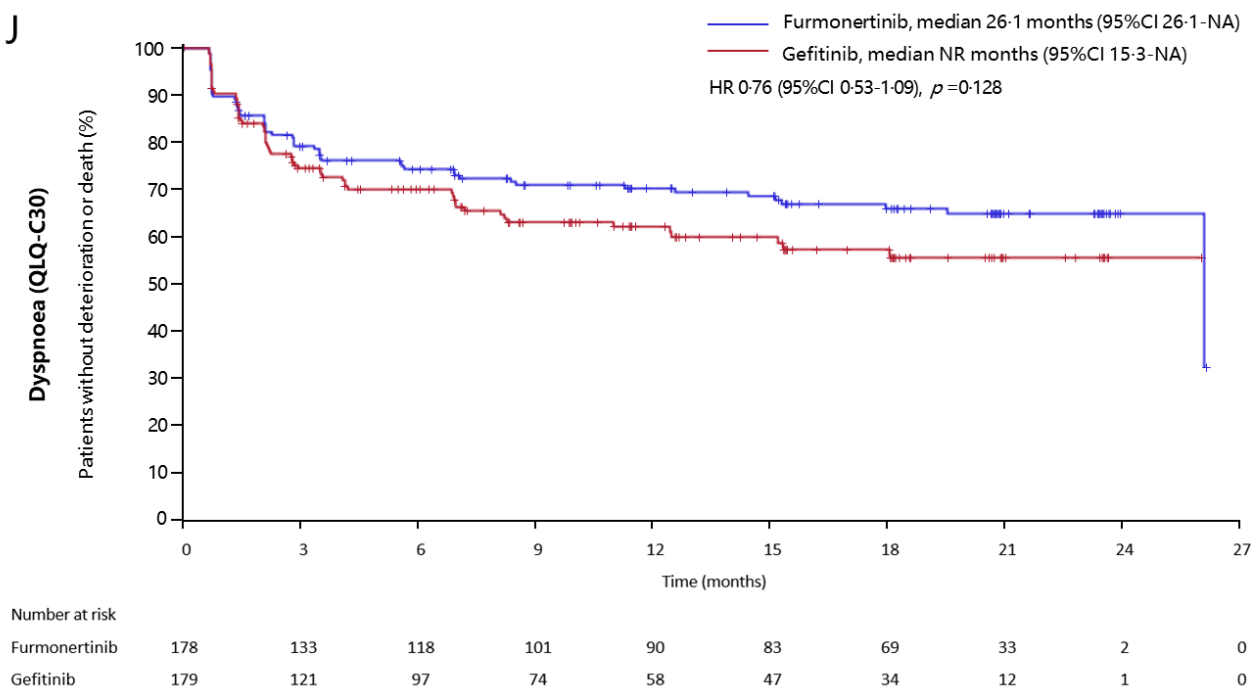

K

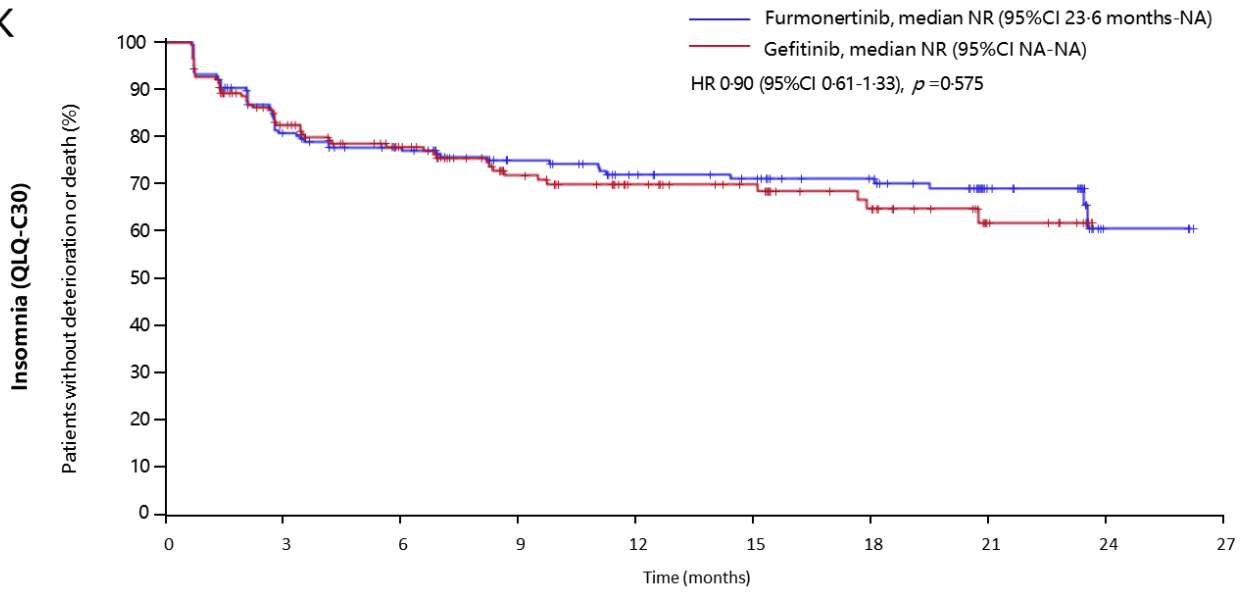

Number at risk

|               |     |     |     |     |    |    |    |    |   |   |
|---------------|-----|-----|-----|-----|----|----|----|----|---|---|
| Furmonertinib | 178 | 133 | 119 | 103 | 90 | 83 | 71 | 32 | 3 | 0 |
| Gefitinib     | 179 | 130 | 102 | 76  | 58 | 49 | 35 | 15 | 0 | 0 |

L

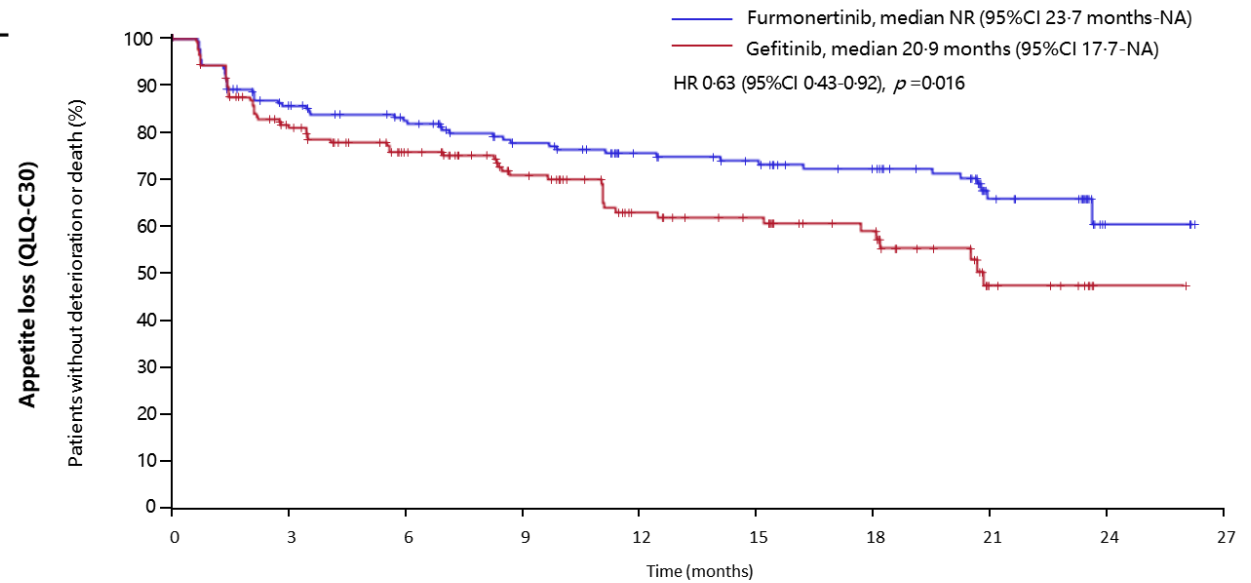

Number at risk

|               |     |     |     |     |    |    |    |    |   |   |
|---------------|-----|-----|-----|-----|----|----|----|----|---|---|
| Furmonertinib | 178 | 142 | 127 | 110 | 96 | 88 | 77 | 37 | 3 | 0 |
| Gefitinib     | 179 | 132 | 106 | 81  | 57 | 50 | 36 | 12 | 1 | 0 |

M

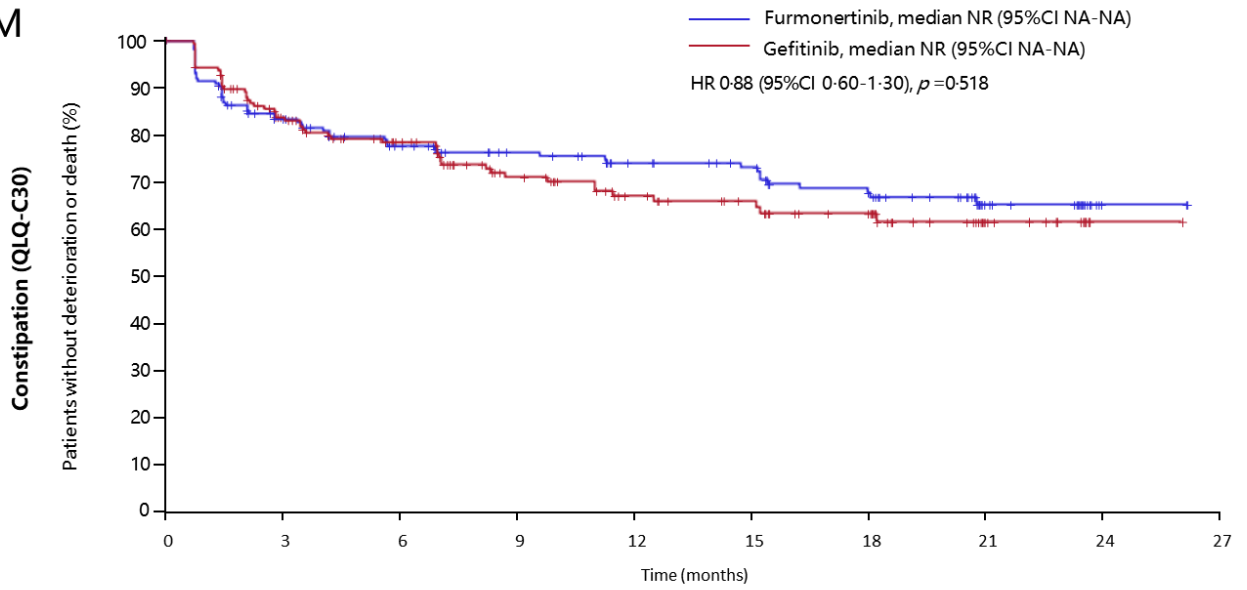

Number at risk

|               |     |     |     |     |    |    |    |    |   |   |
|---------------|-----|-----|-----|-----|----|----|----|----|---|---|
| Furmonertinib | 178 | 136 | 117 | 102 | 91 | 85 | 70 | 31 | 2 | 0 |
| Gefitinib     | 179 | 132 | 104 | 77  | 60 | 51 | 40 | 16 | 1 | 0 |

N

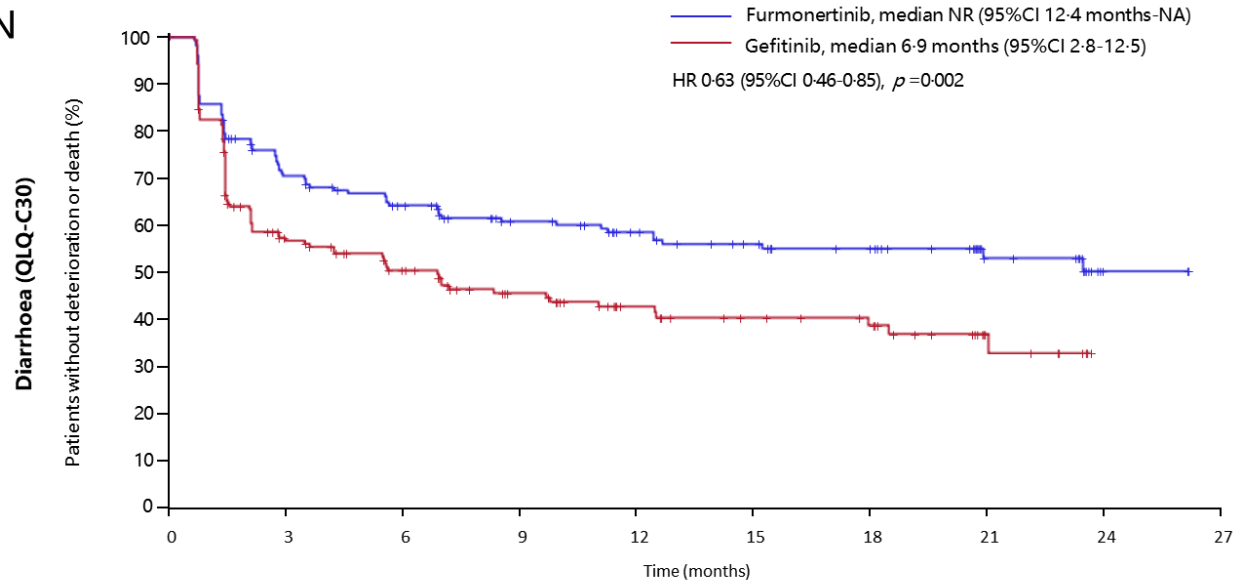

Number at risk

|               |     |     |    |    |    |    |    |    |   |   |
|---------------|-----|-----|----|----|----|----|----|----|---|---|
| Furmonertinib | 178 | 116 | 99 | 82 | 71 | 61 | 52 | 25 | 2 | 0 |
| Gefitinib     | 179 | 88  | 67 | 50 | 36 | 29 | 24 | 9  | 0 | 0 |

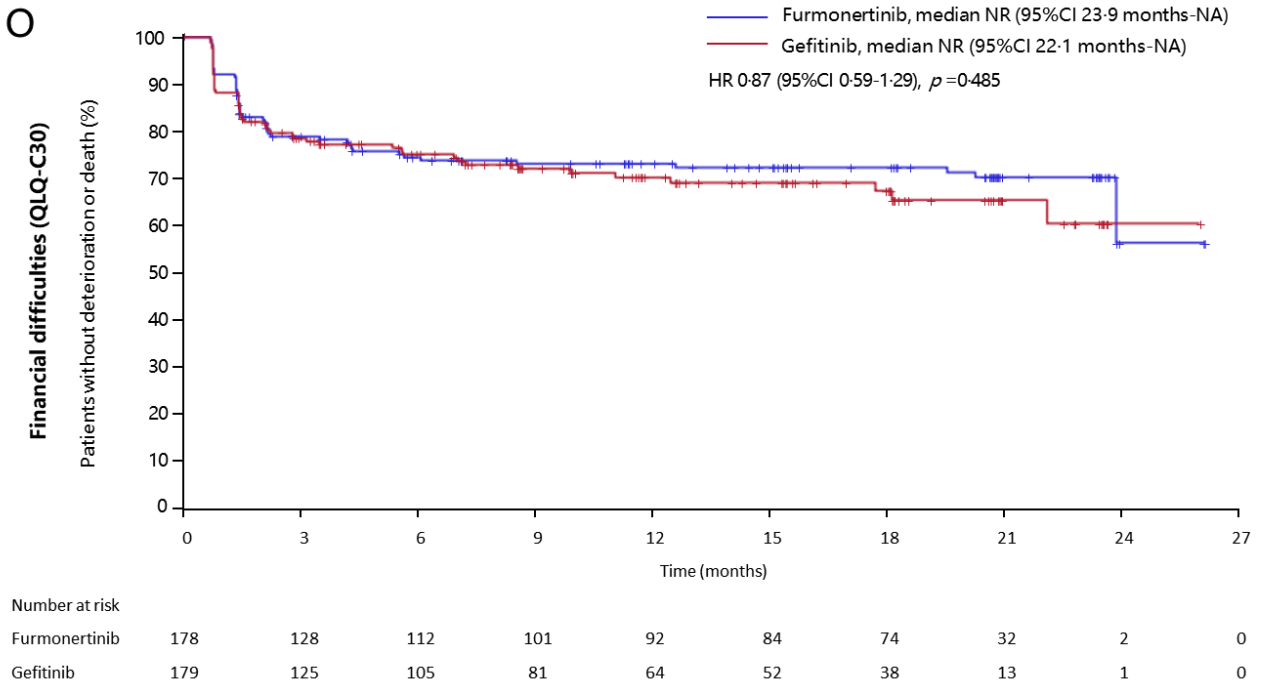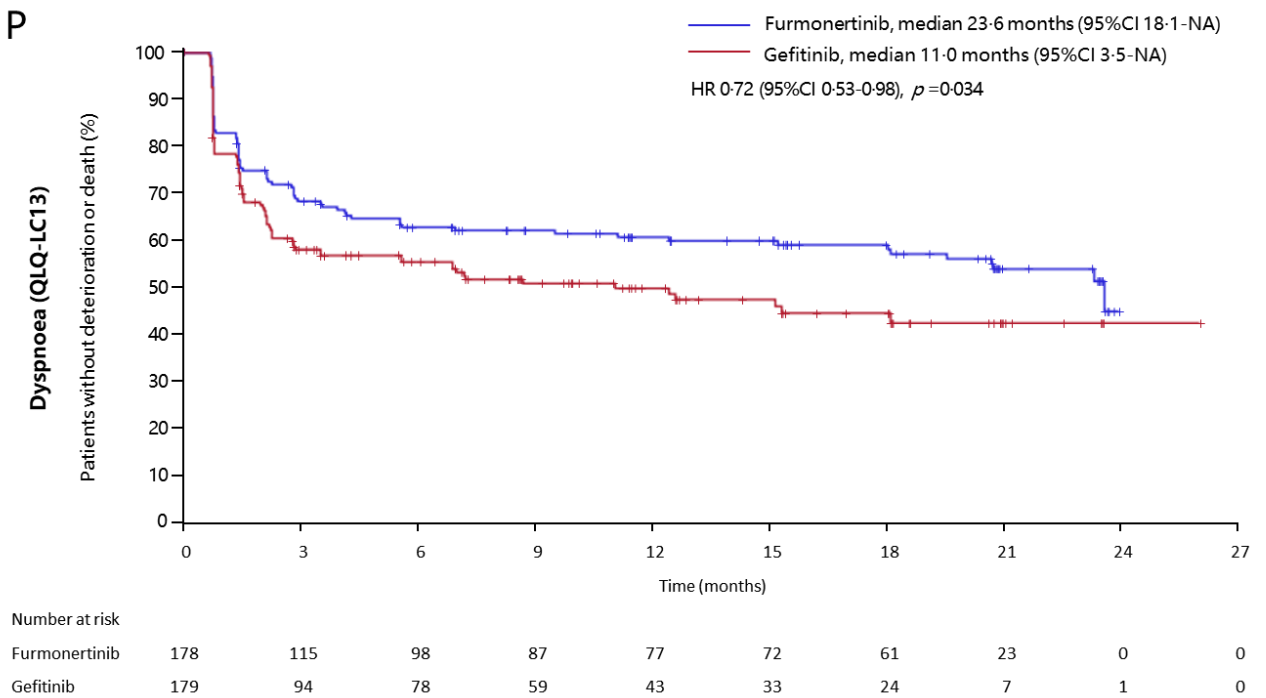

Q

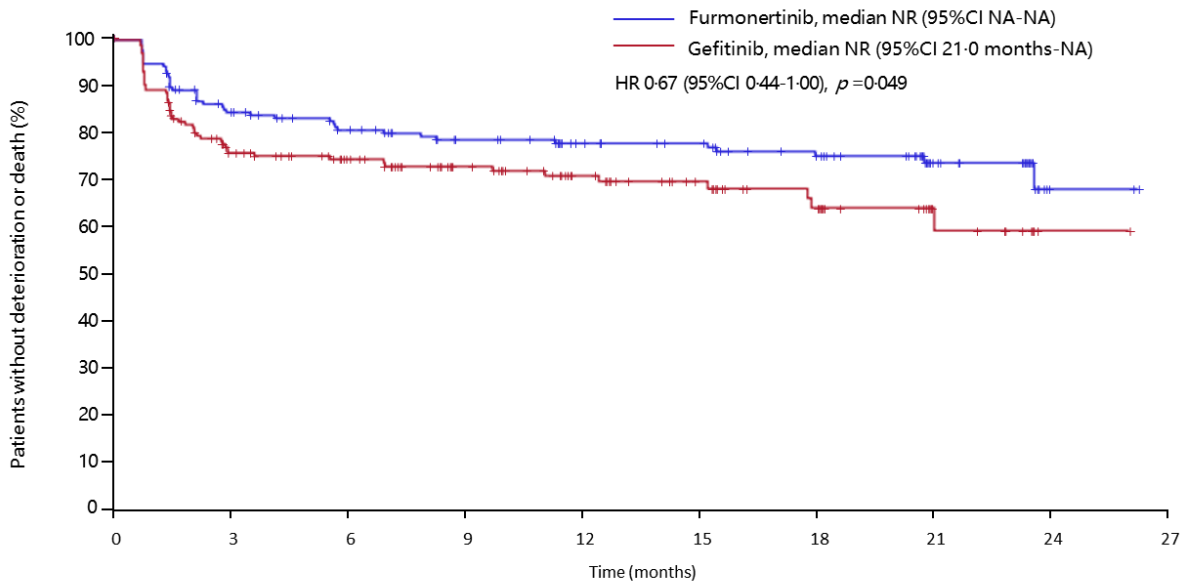

Number at risk

|               |     |     |     |     |    |    |    |    |   |   |
|---------------|-----|-----|-----|-----|----|----|----|----|---|---|
| Furmonertinib | 178 | 140 | 123 | 109 | 97 | 91 | 77 | 35 | 2 | 0 |
| Gefitinib     | 179 | 120 | 98  | 78  | 60 | 45 | 31 | 13 | 1 | 0 |

R

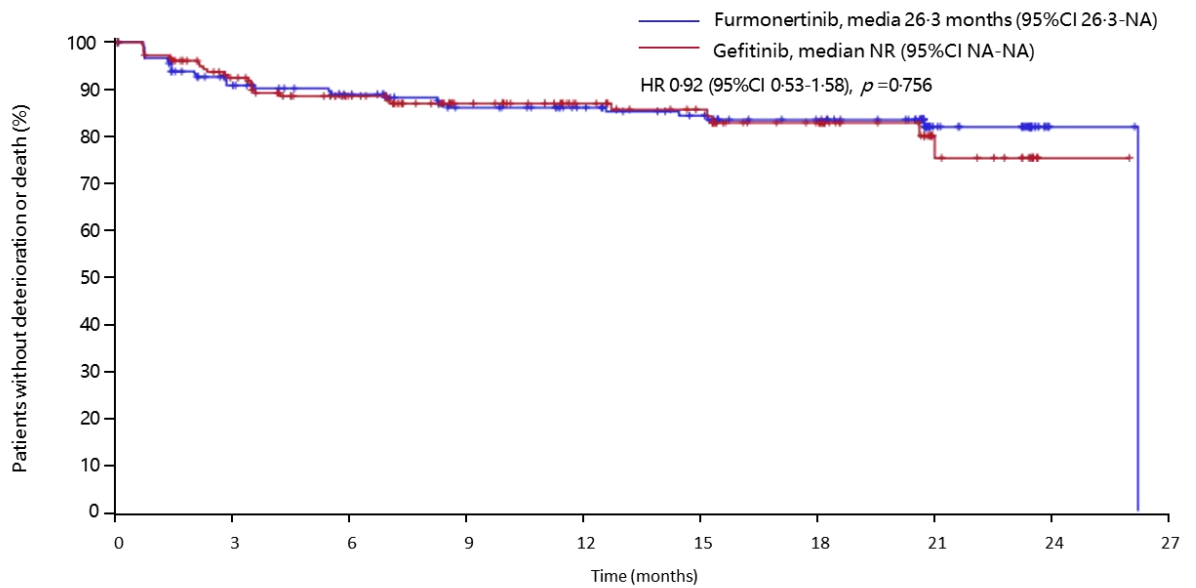

Number at risk

|               |     |     |     |     |     |    |    |    |   |   |
|---------------|-----|-----|-----|-----|-----|----|----|----|---|---|
| Furmonertinib | 178 | 149 | 135 | 117 | 106 | 96 | 84 | 37 | 2 | 0 |
| Gefitinib     | 179 | 147 | 117 | 91  | 72  | 61 | 45 | 17 | 1 | 0 |



S

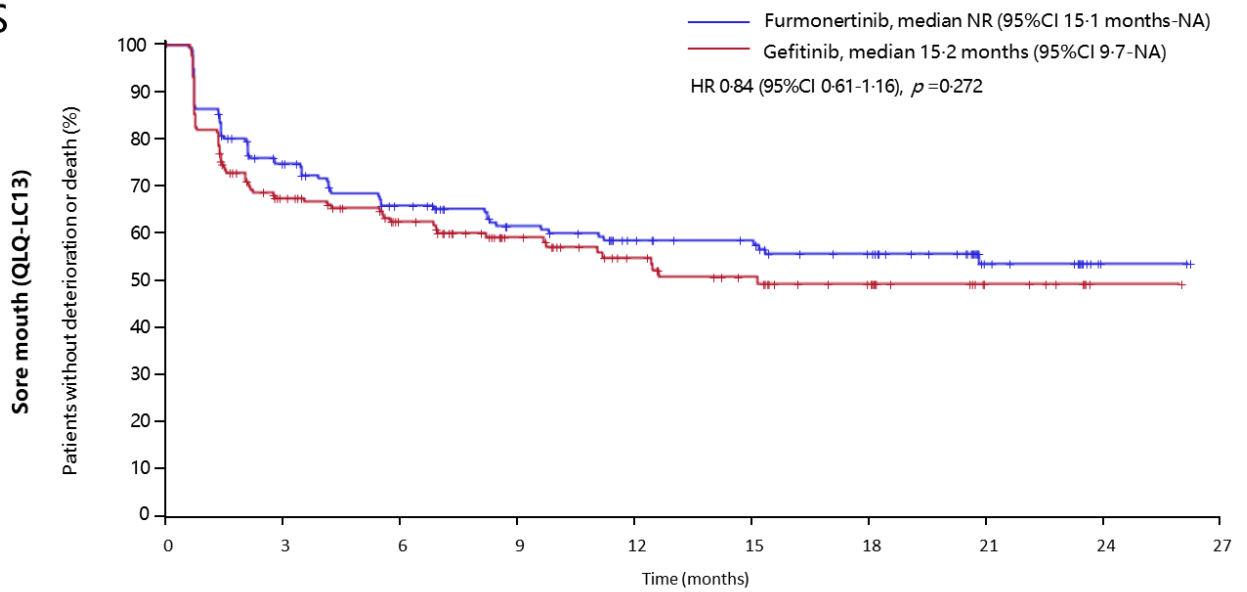

Number at risk

|               |     |     |    |    |    |    |    |    |   |   |
|---------------|-----|-----|----|----|----|----|----|----|---|---|
| Furmonertinib | 178 | 122 | 98 | 81 | 69 | 63 | 53 | 22 | 2 | 0 |
| Gefitinib     | 179 | 105 | 79 | 58 | 43 | 33 | 23 | 9  | 1 | 0 |

T

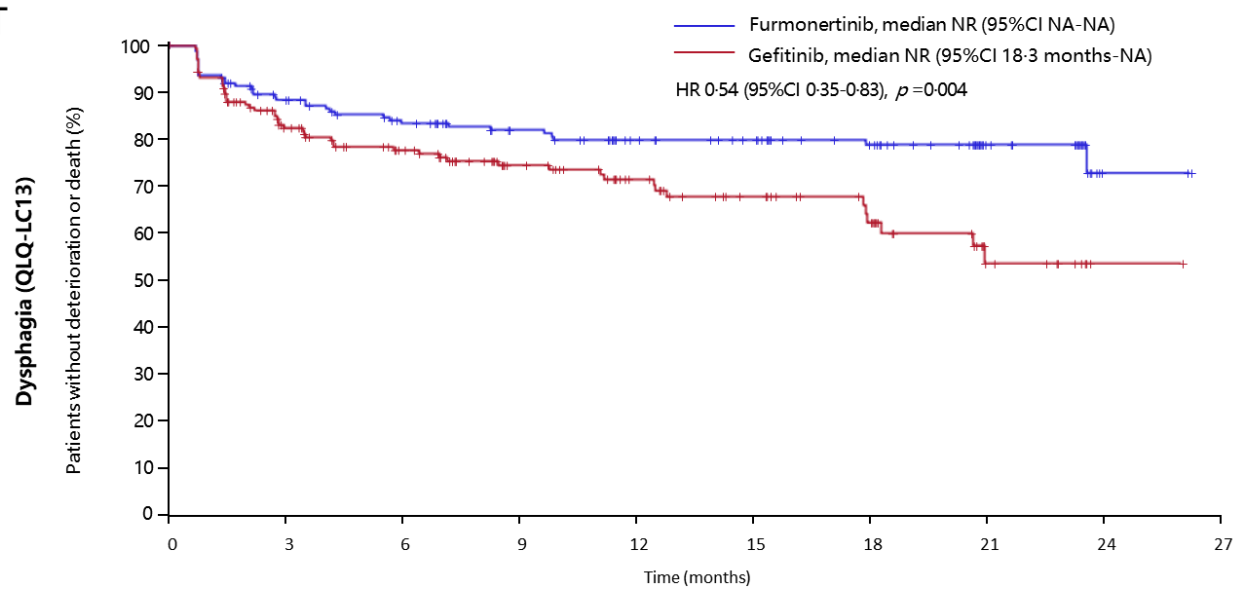

Number at risk

|               |     |     |     |     |     |    |    |    |   |   |
|---------------|-----|-----|-----|-----|-----|----|----|----|---|---|
| Furmonertinib | 178 | 146 | 129 | 114 | 100 | 93 | 80 | 37 | 2 | 0 |
| Gefitinib     | 179 | 128 | 106 | 80  | 61  | 46 | 34 | 13 | 1 | 0 |

U

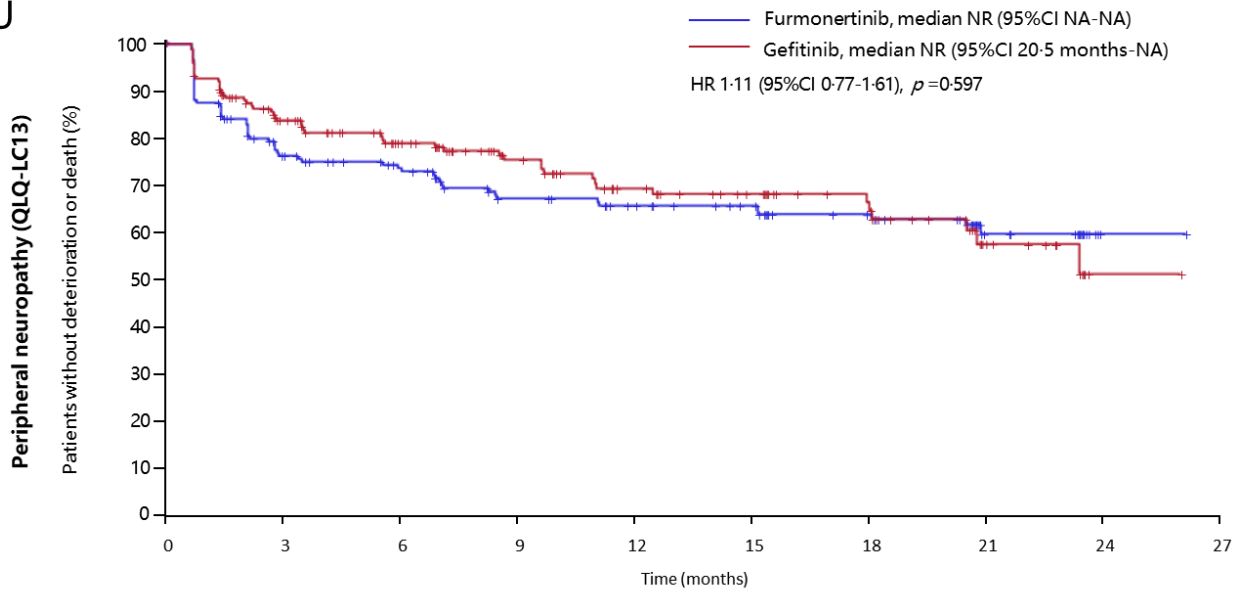

Number at risk

|               |     |     |     |    |    |    |    |    |   |   |
|---------------|-----|-----|-----|----|----|----|----|----|---|---|
| Furmonertinib | 178 | 123 | 108 | 89 | 81 | 74 | 63 | 26 | 1 | 0 |
| Gefitinib     | 179 | 132 | 102 | 78 | 61 | 50 | 38 | 15 | 1 | 0 |

V

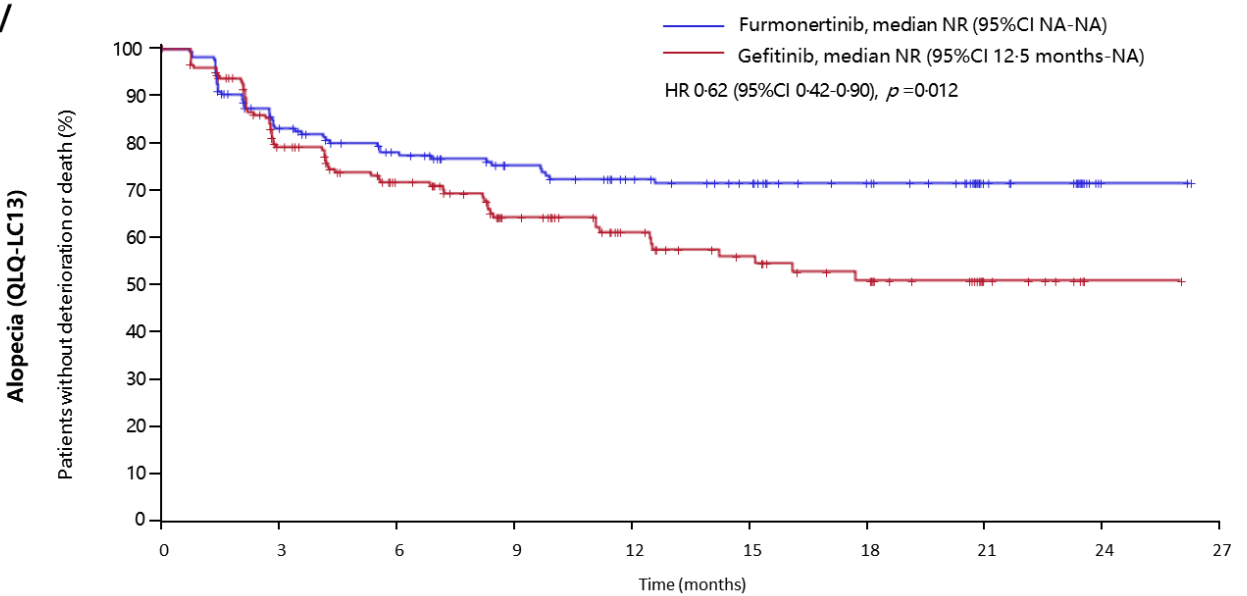

Number at risk

|               |     |     |     |     |    |    |    |    |   |   |
|---------------|-----|-----|-----|-----|----|----|----|----|---|---|
| Furmonertinib | 178 | 136 | 117 | 102 | 90 | 81 | 70 | 34 | 2 | 0 |
| Gefitinib     | 179 | 124 | 95  | 70  | 51 | 38 | 27 | 9  | 1 | 0 |

W

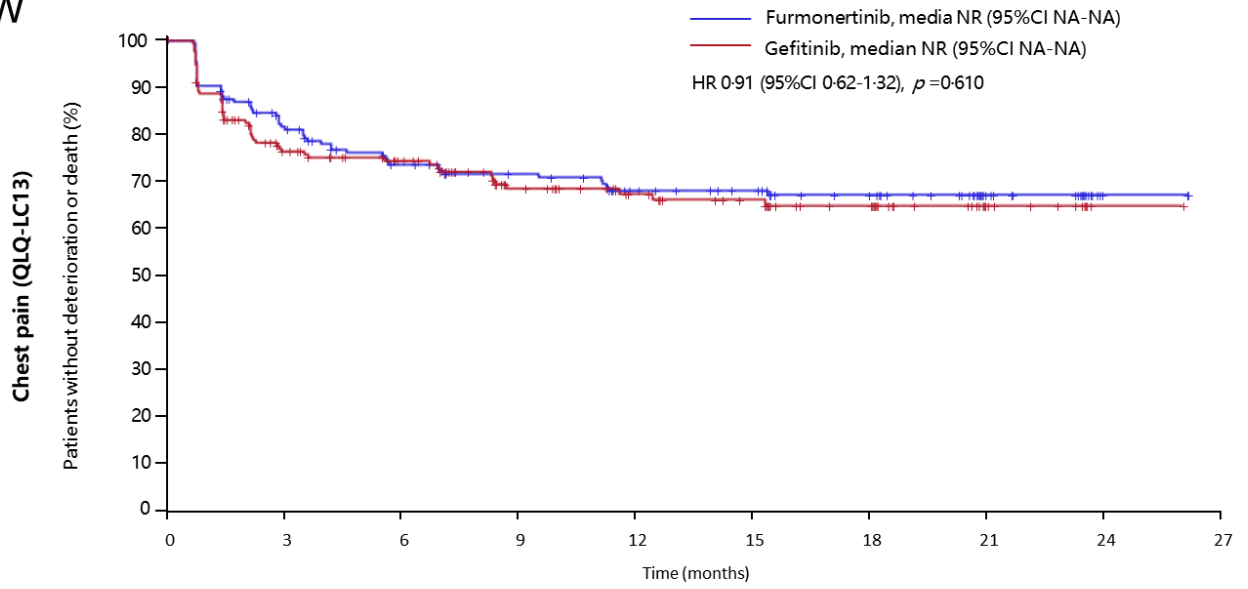

Number at risk

|               |     |     |     |     |    |    |    |    |   |   |
|---------------|-----|-----|-----|-----|----|----|----|----|---|---|
| Furmonertinib | 178 | 135 | 113 | 102 | 88 | 82 | 69 | 32 | 2 | 0 |
| Gefitinib     | 179 | 120 | 199 | 70  | 57 | 49 | 37 | 15 | 1 | 0 |

X

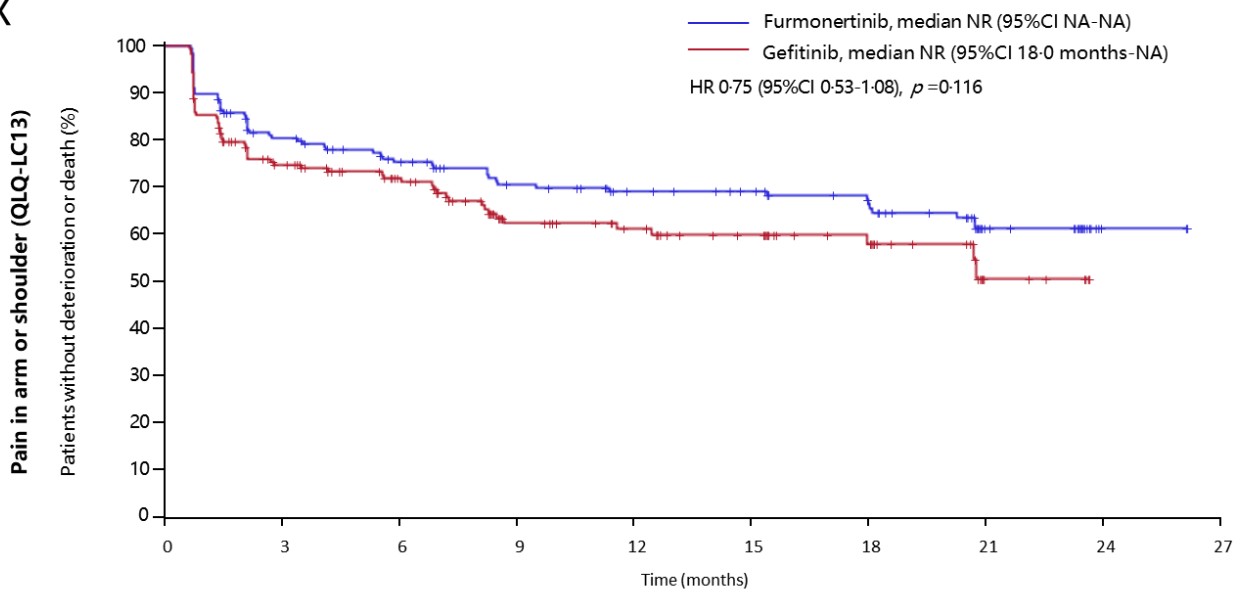

Number at risk

|               |     |     |     |     |    |    |    |    |   |   |
|---------------|-----|-----|-----|-----|----|----|----|----|---|---|
| Furmonertinib | 178 | 132 | 115 | 100 | 90 | 84 | 72 | 31 | 2 | 0 |
| Gefitinib     | 179 | 118 | 93  | 60  | 49 | 40 | 29 | 7  | 0 | 0 |

Y

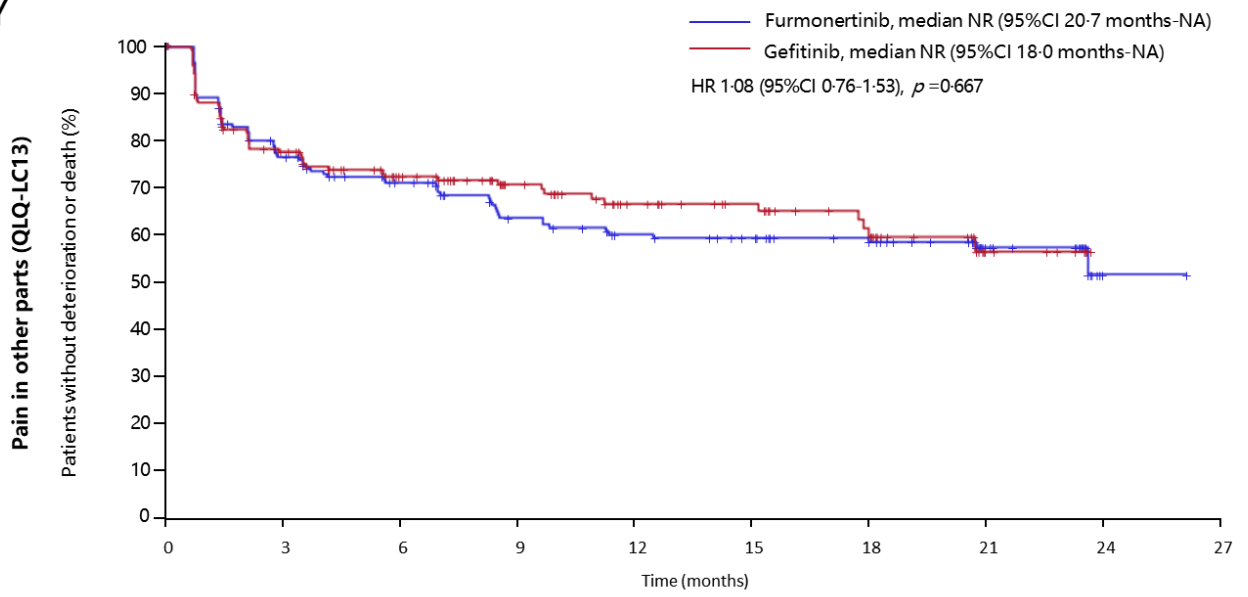

Number at risk

|               |     |     |     |    |    |    |    |    |   |   |
|---------------|-----|-----|-----|----|----|----|----|----|---|---|
| Furmonertinib | 178 | 130 | 111 | 91 | 81 | 73 | 64 | 31 | 1 | 0 |
| Gefitinib     | 179 | 125 | 95  | 73 | 54 | 45 | 32 | 9  | 0 | 0 |
